# Supplementary material
Source: Springer Nature journal article supplement (https://www.springermedizin.de/resource/supplementary/13229_2013_160_MOESM3_ESM.pdf/9676214)
Supplement: MOESM3 [file 9676214]

Family 1

Table with 6 columns: Group, Ran, Gene, Probe, Fold Change, P-Value. Rows include genes like 2891 OLFRL1449, 17821 RFRG, 12638 GFRP1, etc.

Family 2

Table with 6 columns: Group, Ran, Gene, Probe, Fold Change, P-Value. Rows include genes like 1164 NFE2L2, 11313 FT2R1D1, 638 SORBS1, etc.

Family 3

Table with 6 columns: Group, Ran, Gene, Probe, Fold Change, P-Value. Rows include genes like 763 ANGF1, 681 AQ7, 10887 F73004TE0, etc.

Family 4

Table with 6 columns: Group, Ran, Gene, Probe, Fold Change, P-Value. Rows include genes like 1999 NUP133, 705 CYBE5D12, 1961 OLFHR54, etc.

Family 5

Table with 6 columns: Group, Ran, Gene, Probe, Fold Change, P-Value. Rows include genes like 746 UGT1A2, 10722 VCAN, 11028L PDRG1, etc.

Family 6

Table with 6 columns: Group, Ran, Gene, Probe, Fold Change, P-Value. Rows include genes like 630 SNX15, 1596 CLCNKA, 611 NGLY1, etc.

|       |             |         |      |          |
|-------|-------------|---------|------|----------|
| 19112 | TRPV2       | 1690382 | 1.07 | 2.21E-04 |
| 8967  | P2RK5       | 6330451 | 0.95 | 2.27E-04 |
| 13626 | 1700019G1   | 4290341 | 0.96 | 2.34E-04 |
| 6194  | RICS3       | 270541  | 0.89 | 2.38E-04 |
| 19738 | D4WSU53E    | 2030441 | 1.05 | 2.38E-04 |
| 6233  | PCDHGB2     | 6804349 | 1.08 | 2.38E-04 |
| 3010  | CRNA1       | 4256989 | 1.14 | 2.40E-04 |
| 662   | GABRA1      | 2054584 | 1.05 | 2.47E-04 |
| 19918 | AD80010K2   | 7320386 | 1.05 | 2.47E-04 |
| 15999 | RAB8A       | 3440041 | 1.07 | 2.47E-04 |
| 12544 | EG336062    | 6370142 | 1.04 | 2.49E-04 |
| 16733 | HPD         | 2360528 | 1.05 | 2.56E-04 |
| 675   | EBF1        | 3990170 | 1.07 | 2.65E-04 |
| 10921 | ATPA1A      | 5296306 | 1.19 | 2.65E-04 |
| 20476 | EXOSC5      | 5690408 | 0.92 | 2.69E-04 |
| 10645 | H5T1H2BA    | 3940441 | 0.95 | 2.74E-04 |
| 23233 | RAF1        | 770327  | 0.94 | 2.84E-04 |
| 420   | CALR3       | 2000722 | 1.05 | 3.03E-04 |
| 18098 | DGKQ        | 1710474 | 1.06 | 3.08E-04 |
| 1924  | AEBP2       | 610020  | 1.05 | 3.17E-04 |
| 1376  | LIP1        | 3840066 | 1.08 | 3.19E-04 |
| 25220 | CIRBP       | 6980576 | 0.87 | 3.32E-04 |
| 9673  | NRGN        | 4570189 | 1.25 | 3.34E-04 |
| 6866  | VANGL2      | 5310195 | 0.96 | 3.44E-04 |
| 108   | LOC10044    | 2650433 | 0.96 | 3.48E-04 |
| 12235 | PCDHGB6     | 7320041 | 1.04 | 3.54E-04 |
| 15412 | ACSS3       | 2370307 | 1.04 | 3.58E-04 |
| 21    | ZC3H18      | 7380382 | 1.11 | 3.61E-04 |
| 8045  | ANKK2       | 1050709 | 0.93 | 3.76E-04 |
| 20023 | COMMD5      | 5020716 | 0.93 | 3.78E-04 |
| 1576  | AS30032D1   | 1410600 | 0.96 | 3.82E-04 |
| 6657  | DMKN        | 50521   | 0.90 | 3.84E-04 |
| 31    | IERL8       | 4900053 | 0.84 | 3.95E-04 |
| 6823  | BZW2        | 4480546 | 0.94 | 4.00E-04 |
| 9422  | PCDH17      | 6270411 | 0.90 | 4.02E-04 |
| 6057  | RAGB        | 2760465 | 0.91 | 4.08E-04 |
| 51    | 2410018G2   | 6280408 | 0.94 | 4.18E-04 |
| 943   | GSK3A       | 1710630 | 1.08 | 4.20E-04 |
| 10182 | INSIG1      | 4920369 | 0.89 | 4.22E-04 |
| 22598 | SUPT5H      | 7400546 | 1.17 | 4.28E-04 |
| 3172  | PRSS29      | 2470762 | 0.95 | 4.29E-04 |
| 2109  | SEXPINB3B   | 1902066 | 0.95 | 4.30E-04 |
| 1066  | FYFNB       | 6550309 | 0.84 | 4.36E-04 |
| 7216  | MYOCD       | 4830711 | 1.04 | 4.38E-04 |
| 3121  | TM2D2       | 1240279 | 0.89 | 4.44E-04 |
| 566   | SUMF2       | 2470279 | 0.92 | 4.56E-04 |
| 5062  | DEX1        | 2470044 | 0.91 | 4.58E-04 |
| 4069  | ABC2F       | 1500110 | 1.10 | 4.73E-04 |
| 19258 | SCAR2B      | 3310564 | 1.10 | 4.75E-04 |
| 1764  | TKE         | 2360519 | 1.10 | 4.78E-04 |
| 1200  | OLFR313     | 3940376 | 0.95 | 4.85E-04 |
| 21245 | LXRCOR1     | 4780041 | 0.94 | 4.86E-04 |
| 1059  | GLIS3       | 6400825 | 0.96 | 4.90E-04 |
| 15265 | LOC56723    | 1660014 | 0.96 | 4.90E-04 |
| 22770 | LOC1700166G | 5220307 | 0.95 | 4.98E-04 |
| 7817  | COPE        | 6040433 | 0.91 | 4.99E-04 |
| 15887 | TXK         | 7150561 | 1.04 | 0.001    |
| 18952 | RAB8A       | 1240324 | 0.93 | 0.001    |
| 20105 | MPS25       | 7050128 | 0.88 | 0.001    |
| 16703 | SFRS4       | 5910424 | 1.12 | 0.001    |
| 22972 | OLFR335     | 5260224 | 1.05 | 0.001    |
| 9503  | ZEB2        | 2850703 | 1.17 | 0.001    |
| 1804  | GM1008      | 630397  | 1.05 | 0.001    |
| 15193 | ZFP58       | 5670471 | 0.95 | 0.001    |
| 12303 | LOC100044   | 5310408 | 1.04 | 0.001    |
| 24592 | TTL1        | 7100180 | 0.94 | 0.001    |
| 9499  | GM1070      | 5310296 | 1.06 | 0.001    |
| 3795  | LMBR1       | 2360484 | 1.07 | 0.001    |
| 23043 | MGC10709    | 6960474 | 1.04 | 0.001    |
| 1899  | ITGA2B      | 6520221 | 1.07 | 0.001    |
| 13742 | CORO1B      | 3840092 | 0.89 | 0.001    |
| 10614 | LOC100045   | 50576   | 0.97 | 0.001    |
| 5008  | ANKZF1      | 2340750 | 1.05 | 0.001    |
| 4422  | Z03038M     | 5906069 | 1.05 | 0.001    |
| 7277  | WKB6        | 4880382 | 1.05 | 0.001    |
| 413   | 4B93054O4   | 1230008 | 0.95 | 0.001    |
| 21272 | DDX47       | 6480862 | 0.92 | 0.001    |
| 23207 | PNPLA6      | 6250414 | 1.07 | 0.001    |
| 16491 | PDE1A       | 1820341 | 1.16 | 0.001    |
| 4934  | TMD4        | 3840367 | 0.95 | 0.001    |
| 219   | IL7R        | 1780079 | 0.95 | 0.001    |
| 11976 | NROB2       | 5420398 | 0.95 | 0.001    |
| 12289 | EGFLAM      | 1340670 | 1.04 | 0.001    |
| 6206  | ISGZ0L1     | 4290554 | 0.95 | 0.001    |
| 203   | PNPLP1      | 1990440 | 1.08 | 0.001    |
| 440   | APFX1       | 6250138 | 0.95 | 0.001    |
| 464   | RAB12       | 5550482 | 1.04 | 0.001    |
| 3876  | BICD2       | 5810181 | 1.06 | 0.001    |
| 21966 | CAMA4       | 6280092 | 0.94 | 0.001    |

|       |            |           |         |          |          |
|-------|------------|-----------|---------|----------|----------|
| 9881  | CNTN3      | 4010463   | 0.93    | 1.33E-04 |          |
| 6558  | CO30046E1  | 10504     | 0.94    | 1.36E-04 |          |
| 6200  | SON        | 3290132   | 1.08    | 1.36E-04 |          |
| 6132  | Z120136C1  | 7050328   | 1.07    | 1.39E-04 |          |
| 22276 | RTNA       | 6520138   | 0.92    | 1.39E-04 |          |
| 5871  | ASB3       | 2370577   | 0.94    | 1.40E-04 |          |
| 4049  | SCDC5B     | 4670497   | 0.88    | 1.44E-04 |          |
| 330   | KCNT1      | 460121    | 1.07    | 1.46E-04 |          |
| 16301 | CASP9      | 840411    | 0.95    | 1.47E-04 |          |
| 16252 | AP0D1      | 6770403   | 0.87    | 1.52E-04 |          |
| 1282  | C7SF       | 5910452   | 1.08    | 1.57E-04 |          |
| 1060  | SLC24A5    | 6130242   | 0.91    | 1.61E-04 |          |
| 8112  | ING3       | 2360138   | 0.92    | 1.63E-04 |          |
| 815   | NPNT       | 1940543   | 0.95    | 1.65E-04 |          |
| 6285  | H2-K1      | 6280026   | 0.96    | 1.66E-04 |          |
| 10940 | NSP8P18    | 2490279   | 0.85    | 1.69E-04 |          |
| 6615  | OLFR519    | 6960546   | 1.07    | 1.74E-04 |          |
| 7067  | PCDH7      | 1250403   | 1.04    | 1.81E-04 |          |
| 22540 | GRW211     | 2140403   | 1.08    | 1.87E-04 |          |
| 1424  | RALBP1     | 2650370   | 0.89    | 1.90E-04 |          |
| 25011 | RGS5       | 3170053   | 1.09    | 1.90E-04 |          |
| 6728  | HIST1H2BB  | 1410195   | 1.06    | 2.01E-04 |          |
| 432   | PFP208     | 2120112   | 0.94    | 2.01E-04 |          |
| 426   | DTX4       | 1310102   | 0.92    | 2.06E-04 |          |
| 8049  | KATNAL1    | 6350437   | 0.93    | 2.09E-04 |          |
| 5062  | DEX1       | 2470044   | 0.94    | 2.10E-04 |          |
| 7374  | AMPPD3     | 540446    | 1.06    | 2.14E-04 |          |
| 9207  | SPSB1      | 5700066   | 0.92    | 2.17E-04 |          |
| 5303  | HILT       | 4610326   | 0.94    | 2.17E-04 |          |
| 7917  | MTMR11     | 2970609   | 1.08    | 2.32E-04 |          |
| 752   | NALCF2     | 5290255   | 0.95    | 2.38E-04 |          |
| 2187  | CEBPA      | 7380400   | 0.96    | 2.40E-04 |          |
| 6837  | OLFR458    | 6200132   | 1.05    | 2.46E-04 |          |
| 3601  | BC03190L   | 1440397   | 0.95    | 2.51E-04 |          |
| 41    | KXRB       | 770133    | 1.09    | 2.51E-04 |          |
| 6494  | YX2D1      | 1110064   | 0.93    | 2.53E-04 |          |
| 2825  | D1ST       | 2480482   | 0.88    | 2.53E-04 |          |
| 21523 | ADCY1      | 7560367   | 0.85    | 2.57E-04 |          |
| 25495 | Z1F301     | 1070070   | 0.89    | 2.59E-04 |          |
| 21305 | GTCC       | 10300038  | 0.79    | 2.60E-04 |          |
| 4810  | ADBR2      | 4804074   | 1.06    | 2.71E-04 |          |
| 613   | MAS1L      | 2970004   | 1.04    | 2.74E-04 |          |
| 12182 | TMSF17     | 7610477   | 0.97    | 2.74E-04 |          |
| 16147 | AKT3       | 50603     | 0.93    | 2.77E-04 |          |
| 7226  | TM6D2      | 5730502D1 | 4210541 | 0.93     | 2.82E-04 |
| 10508 | COXANB     | 3440280   | 1.08    | 2.85E-04 |          |
| 5062  | ETS1       | 5340630   | 1.06    | 2.85E-04 |          |
| 10518 | ZFP622     | 6580437   | 0.96    | 2.86E-04 |          |
| 3098  | MOSP01     | 990349    | 1.07    | 2.91E-04 |          |
| 8815  | ARHGAP1    | 160528    | 0.89    | 2.91E-04 |          |
| 2840  | TMCA       | 1660450   | 1.05    | 2.93E-04 |          |
| 16292 | RNF125     | 4210463   | 0.95    | 3.05E-04 |          |
| 15080 | TRAF7      | 990295    | 0.96    | 3.05E-04 |          |
| 5280  | SERPINH1   | 4850221   | 0.91    | 3.56E-04 |          |
| 21109 | PNP5B      | 5220373   | 1.05    | 3.62E-04 |          |
| 8044  | UCP2       | 5260730   | 1.07    | 3.68E-04 |          |
| 17068 | 261020H0   | 4760095   | 1.07    | 3.77E-04 |          |
| 1830  | ZFP454     | 2710397   | 1.06    | 3.97E-04 |          |
| 3201  | SLC15A2    | 4120750   | 1.07    | 3.99E-04 |          |
| 13391 | SERPINC1C  | 7510296   | 0.93    | 4.07E-04 |          |
| 13405 | WCV15      | 2070730   | 1.06    | 4.34E-04 |          |
| 3098  | MOSPD1     | 990349    | 0.91    | 4.44E-04 |          |
| 651   | MSTO1      | 4860402   | 1.10    | 4.78E-04 |          |
| 1006  | PYD6       | 6530309   | 0.82    | 4.99E-04 |          |
| 22018 | BC02505G   | 6450474   | 1.05    | 6.82E-04 |          |
| 974   | NS2NB      | 2650054   | 0.93    | 6.90E-04 |          |
| 23758 | KNTC1      | 1410070   | 1.07    | 6.94E-04 |          |
| 9910  | A700008L0  | 150059    | 1.08    | 7.31E-04 |          |
| 22590 | SLC34B2    | 5700743   | 0.93    | 7.34E-04 |          |
| 13661 | OLFR1013   | 4060358   | 1.05    | 7.58E-04 |          |
| 3658  | S100A4     | 5206466   | 0.94    | 7.69E-04 |          |
| 18015 | TREM1L1    | 6400307   | 1.06    | 7.78E-04 |          |
| 12691 | SL1        | 1430139   | 0.93    | 7.97E-04 |          |
| 2958  | KHN1       | 450097    | 0.94    | 7.86E-04 |          |
| 16810 | LOC10007P2 | 1070170   | 1.15    | 7.94E-04 |          |
| 415   | TGFB1BP2   | 220551    | 1160    | 7.97E-04 |          |
| 2093  | PP2CB      | 6380484   | 1.10    | 8.02E-04 |          |
| 11472 | HDXD11     | 6200669   | 1.06    | 8.14E-04 |          |
| 9095  | TMEM184A   | 3780113   | 1.06    | 8.18E-04 |          |
| 185   | WDR31      | 2340338   | 1.07    | 8.18E-04 |          |
| 4604  | CNBP2      | 2490554   | 0.90    | 8.31E-04 |          |
| 95    | SERHL      | 5360041   | 0.94    | 8.61E-04 |          |
| 7006  | GRP27      | 6200253   | 0.93    | 8.65E-04 |          |
| 21927 | ZFP239     | 9900339   | 1.08    | 8.78E-04 |          |
| 137   | PKHD1      | 4860333   | 0.93    | 8.86E-04 |          |
| 7486  | FSM3A3     | 4850181   | 0.93    | 8.88E-04 |          |
| 2427  | SPFH1      | 7900598   | 0.94    | 9.27E-04 |          |
| 232   | OLFR482    | 3800292   | 0.95    | 9.46E-04 |          |
| 16590 | TRAM1      | 4480402   | 0.91    | 5.03E-04 |          |

|       |            |         |      |          |
|-------|------------|---------|------|----------|
| 9942  | FLJ1       | 4220050 | 1.07 | 1.15E-06 |
| 16084 | P5MD11     | 5870291 | 1.04 | 1.18E-06 |
| 956   | UGT2B37    | 2860463 | 0.97 | 1.18E-06 |
| 22822 | ADD3       | 3450040 | 0.87 | 1.19E-06 |
| 1822  | VKR1       | 6420379 | 0.93 | 1.26E-06 |
| 7597  | 4921511H0  | 520717  | 1.06 | 1.30E-06 |
| 2739  | SDCCAG8    | 5390593 | 1.11 | 1.34E-06 |
| 383   | 1700123K0  | 840634  | 0.92 | 1.43E-06 |
| 2242  | OLFR362    | 6860670 | 0.92 | 1.53E-06 |
| 2186  | RBM8A2     | 2190528 | 0.87 | 1.56E-06 |
| 261   | Z1C4       | 5890528 | 0.91 | 1.58E-06 |
| 657   | F8         | 6200551 | 1.08 | 1.67E-06 |
| 345   | TRABD      | 2690240 | 1.11 | 1.71E-06 |
| 6017  | HOMER1     | 1510672 | 1.06 | 1.71E-06 |
| 21592 | INSIG2     | 7510356 | 1.12 | 1.71E-06 |
| 3800  | SEC14L3    | 3990138 | 1.04 | 1.73E-06 |
| 179   | EGZ23201   | 6590379 | 0.94 | 1.76E-06 |
| 18820 | TMEM17     | 2970537 | 1.10 | 1.78E-06 |
| 22540 | GRW211     | 2140403 | 1.08 | 1.93E-06 |
| 8682  | CDC14B     | 10255   | 0.91 | 1.94E-06 |
| 18658 | ZP1        | 1090543 | 1.09 | 1.94E-06 |
| 4955  | SNK14      | 1740577 | 1.04 | 1.95E-06 |
| 13473 | PANX4D2    | 6420452 | 1.11 | 2.02E-06 |
| 3304  | YTHDF3     | 5700286 | 0.94 | 2.10E-06 |
| 360   | SLC35C1    | 3390328 | 0.92 | 2.13E-06 |
| 351   | H56T51     | 6350402 | 0.88 | 2.15E-06 |
| 210   | MTIF2      | 6940017 | 0.93 | 2.25E-06 |
| 504   | CDM1D3     | 1070438 | 1.09 | 2.27E-06 |
| 494   | SAMS91     | 6020400 | 1.11 | 2.30E-06 |
| 5943  | KLHL5      | 6380373 | 1.08 | 2.32E-06 |
| 1519  | TALD01     | 7150121 | 1.08 | 2.38E-06 |
| 124   | PYPA2      | 5820646 | 0.95 | 2.31E-06 |
| 16272 | 281041C1   | 5490598 | 0.94 | 2.96E-06 |
| 15912 | STAR       | 6110322 | 1.04 | 3.07E-06 |
| 13883 | ASB1       | 1510564 | 1.07 | 3.07E-06 |
| 142   | RBM47      | 6420372 | 0.95 | 3.16E-06 |
| 7893  | PIGK       | 6760192 | 0.93 | 3.30E-06 |
| 25637 | IRAK4      | 5240452 | 0.94 | 3.38E-06 |
| 21420 | TRAM1      | 5270452 | 0.79 | 3.48E-06 |
| 23107 | Z121003L11 | 4120437 | 1.09 | 3.79E-06 |
| 3437  | ACSL3      | 5560615 | 0.86 | 3.92E-06 |
| 5024  | CALD1      | 2104241 | 1.07 | 4.04E-06 |
| 1100  | CDH16      | 6220440 | 0.86 | 4.11E-06 |
| 1526  |            |         |      |          |

|       |           |         |       |       |
|-------|-----------|---------|-------|-------|
| 606   | MEK3C     | 1010446 | 1.04  | 0.001 |
| 8938A | 1780020   | 0.93    | 0.001 |       |
| 951   | CLK2      | 2970646 | 1.06  | 0.001 |
| 11960 | CSNK1G2   | 6480168 | 0.88  | 0.001 |
| 10133 | UMODL1    | 6130154 | 0.94  | 0.001 |
| 3648  | DUSP27    | 6060949 | 1.06  | 0.001 |
| 6551  | ZFP709    | 5570754 | 1.06  | 0.001 |
| 9400  | PABPC4L   | 5220703 | 1.04  | 0.001 |
| 2735  | ZCCHC1E   | 3120377 | 1.06  | 0.001 |
| 11553 | F830116E1 | 6350215 | 1.06  | 0.001 |
| 9165  | PBK1      | 1470315 | 0.95  | 0.001 |
| 4655  | YVHAH     | 2190544 | 1.08  | 0.001 |
| 6479  | AU040320  | 990202  | 1.06  | 0.001 |
| 1221  | F8EB3A.1  | 6110133 | 0.95  | 0.001 |
| 5424  | ACAD10    | 5570379 | 1.03  | 0.001 |
| 12529 | BC024479  | 3850338 | 1.05  | 0.001 |
| 20880 | H51T1H18  | 1470050 | 0.95  | 0.001 |
| 9768  | AKT3      | 7150521 | 0.94  | 0.001 |
| 7255  | F8A5428L1 | 4380110 | 0.95  | 0.001 |
| 24826 | NSL1      | 650048  | 1.04  | 0.001 |
| 1165  | APH1B     | 6220612 | 1.06  | 0.001 |
| 2348  | OTTMUSGG  | 780528  | 1.06  | 0.001 |
| 991   | BC088983  | 3520138 | 1.05  | 0.001 |
| 342   | FIF3      | 4220433 | 0.84  | 0.001 |
| 45    | CD027     | 5690056 | 1.07  | 0.001 |
| 14374 | SFRS3     | 1340040 | 0.93  | 0.001 |
| 12921 | B230118HD | 830026  | 0.96  | 0.001 |
| 19004 | HPGD      | 2450343 | 1.06  | 0.001 |
| 10500 | LOC100044 | 7050446 | 0.90  | 0.001 |
| 114   | COL25A1   | 1070196 | 0.92  | 0.001 |
| 9969  | ARSD      | 1470356 | 1.13  | 0.001 |
| 15667 | ROBO4     | 2630333 | 1.06  | 0.001 |
| 9647  | CAMK2G    | 5260520 | 1.16  | 0.001 |
| 3555  | GRAP      | 510162  | 1.06  | 0.001 |
| 22589 | AA563749  | 4050370 | 1.05  | 0.001 |
| 1109  | 22310047M | 5690753 | 0.90  | 0.001 |
| 16054 | DHRS7B    | 2100465 | 0.87  | 0.001 |
| 6273  | OLFR1324  | 130639  | 0.96  | 0.001 |
| 17371 | LYSMD4    | 2490427 | 0.96  | 0.001 |
| 6081  | F8XO3A    | 3120237 | 1.14  | 0.001 |
| 1231  | MUC10     | 1030504 | 1.05  | 0.001 |
| 3602  | SLOC12A9  | 5220594 | 0.96  | 0.001 |
| 1812  | CALU      | 1410091 | 1.04  | 0.001 |
| 4274  | LIRC3B    | 2360563 | 1.07  | 0.001 |
| 1048  | AFG3L1    | 7550400 | 0.95  | 0.001 |
| 12169 | FTMT      | 3060730 | 1.03  | 0.001 |
| 20382 | G720456B0 | 6620554 | 0.90  | 0.001 |
| 4691  | KHLH32    | 6200079 | 1.08  | 0.001 |
| 24813 | SLOC1B2   | 1410035 | 1.05  | 0.001 |
| 13574 | KHLH26    | 4880133 | 1.05  | 0.001 |
| 1853  | ARD3A     | 7400348 | 1.07  | 0.001 |
| 12942 | OLFR121   | 6900475 | 0.93  | 0.001 |
| 245   | POLR2B    | 6480447 | 0.89  | 0.001 |
| 3509  | COLM      | 3440301 | 1.05  | 0.001 |
| 22527 | MPLR4L    | 4220725 | 1.03  | 0.001 |
| 2890  | GCM1      | 1450376 | 0.96  | 0.001 |
| 2189  | DS5       | 1010368 | 1.09  | 0.001 |
| 6564  | DDX56     | 160189  | 1.03  | 0.001 |
| 1778  | PDLIM1    | 7506773 | 0.93  | 0.001 |
| 16333 | SLOC1A5   | 20647   | 0.94  | 0.001 |
| 17196 | ATXN2     | 4390593 | 1.11  | 0.001 |
| 192   | L6ALS12   | 4210176 | 1.06  | 0.001 |
| 15872 | FANCD2    | 1940020 | 0.92  | 0.001 |
| 24048 | SPCA3     | 60653   | 0.94  | 0.001 |
| 19205 | MRRF49    | 3780435 | 0.93  | 0.001 |
| 1308  | A932441K1 | 2760136 | 0.95  | 0.001 |
| 11599 | A3116807  | 6100050 | 0.94  | 0.001 |
| 10900 | ACIN1     | 4260209 | 1.05  | 0.001 |
| 14400 | AGXT2     | 510554  | 1.04  | 0.001 |
| 709   | PCDBR2    | 7505452 | 1.05  | 0.001 |
| 435   | HTRA      | 1440672 | 1.07  | 0.001 |
| 6435  | STX17     | 3130014 | 0.94  | 0.001 |
| 11929 | AHCTF1    | 2690688 | 1.07  | 0.001 |
| 2420  | NOTCH4    | 4250059 | 0.92  | 0.001 |
| 23694 | TRIM2     | 3460064 | 1.17  | 0.001 |
| 5299  | SCLC3A1   | 2480084 | 1.04  | 0.001 |
| 994   | RABL3     | 2970685 | 0.92  | 0.001 |
| 11774 | EP8A.1L2  | 1770593 | 1.05  | 0.001 |
| 14406 | UMPS      | 1410445 | 0.95  | 0.001 |
| 10414 | OPAH      | 730612  | 0.94  | 0.001 |
| 3496  | EG245376  | 7570358 | 0.96  | 0.001 |
| 1900  | OLFR707   | 5960685 | 0.96  | 0.001 |
| 6686  | 2310079F2 | 1190397 | 0.95  | 0.001 |
| 1057  | SRXN1     | 610463  | 1.08  | 0.001 |
| 5020  | SCA1      | 5080156 | 1.14  | 0.001 |
| 22743 | OLFR1037  | 3120114 | 0.95  | 0.001 |
| 103   | PNPO      | 2005093 | 0.89  | 0.001 |
| 10    | ATP5SL    | 5270131 | 0.87  | 0.001 |
| 9014  | KTN1      | 160014  | 0.95  | 0.001 |

|       |           |         |      |          |
|-------|-----------|---------|------|----------|
| 6447  | ELF3      | 4290075 | 1.05 | 5.20E-04 |
| 9606  | BRPM5     | 2360717 | 1.05 | 5.25E-04 |
| 4402  | SCLC12A3  | 4260377 | 0.96 | 5.38E-04 |
| 8197  | AGR2      | 4760133 | 0.94 | 5.42E-04 |
| 3973  | 4921533L1 | 5390451 | 0.96 | 5.46E-04 |
| 7547  | PD81A     | 7210632 | 0.86 | 5.51E-04 |
| 21198 | HDXC2     | 3780262 | 0.89 | 5.55E-04 |
| 9305  | PUS2      | 240301  | 1.04 | 5.70E-04 |
| 3040  | DNAJB3    | 2000128 | 0.92 | 5.73E-04 |
| 1203  | TNP2      | 510129  | 1.08 | 5.79E-04 |
| 6147  | PZRK6     | 110010  | 1.05 | 5.80E-04 |
| 4403  | OLFR160   | 6480059 | 1.04 | 5.80E-04 |
| 16650 | GMS25     | 3130709 | 1.06 | 5.84E-04 |
| 13498 | SOX6      | 4830239 | 1.04 | 5.88E-04 |
| 18534 | ALG5      | 1400450 | 1.07 | 6.12E-04 |
| 23563 | IGTN      | 3190427 | 1.06 | 6.15E-04 |
| 202   | NLRP1C    | 4150066 | 1.06 | 6.34E-04 |
| 17917 | OLFR1477  | 4220523 | 1.04 | 6.34E-04 |
| 13899 | FORK1     | 2330273 | 1.0  | 6.36E-04 |
| 5068  | BANF2     | 70048   | 1.04 | 6.50E-04 |
| 14801 | NPP4A     | 5360273 | 0.95 | 6.63E-04 |
| 3202  | NIPSNAP3A | 630162  | 0.95 | 6.66E-04 |
| 12039 | PZR2Y10   | 6400070 | 0.96 | 6.80E-04 |
| 16192 | CYP2A12   | 6960037 | 0.94 | 6.97E-04 |
| 45    | CD207     | 5690056 | 1.16 | 6.98E-04 |
| 5950  | OLFR1351  | 1070538 | 0.96 | 7.08E-04 |
| 839   | TNRCC6    | 7160435 | 0.96 | 7.17E-04 |
| 11934 | 1110007L1 | 5270747 | 1.08 | 7.28E-04 |
| 18633 | F8FLA     | 1260477 | 1.03 | 7.33E-04 |
| 18529 | JTB28A    | 3140608 | 1.09 | 7.38E-04 |
| 219   | LTR4      | 1780079 | 0.96 | 7.39E-04 |
| 128   | TRPC4     | 3060398 | 0.94 | 7.39E-04 |
| 24096 | 953006D0  | 1050240 | 1.04 | 7.47E-04 |
| 3044  | HSGF11    | 1660296 | 1.07 | 7.57E-04 |
| 6786  | ITPK1     | 1030605 | 0.92 | 7.59E-04 |
| 7297  | OSY       | 3520632 | 0.89 | 7.61E-04 |
| 22615 | EDC4      | 5050241 | 1.07 | 7.68E-04 |
| 12905 | OLFR1350  | 5570504 | 1.04 | 7.82E-04 |
| 20408 | 4932413O1 | 4200682 | 1.05 | 7.86E-04 |
| 1780  | GTSF1L    | 2760740 | 0.96 | 7.91E-04 |
| 508   | KOPB5A4   | 30729   | 1.05 | 8.00E-04 |
| 2901  | KMTN12    | 6520056 | 0.95 | 8.03E-04 |
| 9754  | MTRF2     | 2470376 | 1.07 | 8.08E-04 |
| 7048  | GYS3      | 5890322 | 1.06 | 8.12E-04 |
| 21516 | MTSS1     | 6900133 | 0.95 | 8.25E-04 |
| 6104  | OLFR1173  | 620220  | 1.06 | 8.29E-04 |
| 3891  | 5IT1      | 430746  | 0.96 | 8.35E-04 |
| 3161  | ARL3      | 2450463 | 1.08 | 8.46E-04 |
| 446   | NGP       | 730487  | 0.95 | 8.47E-04 |
| 6616  | HIF2AK1   | 4220711 | 0.92 | 8.64E-04 |
| 6624  | SPAL1L3   | 4010341 | 0.96 | 8.67E-04 |
| 2947  | WDR37     | 1170719 | 1.05 | 8.68E-04 |
| 2127  | TRNF8     | 3160212 | 0.95 | 8.71E-04 |
| 9917  | ICOS      | 2450329 | 1.06 | 8.85E-04 |
| 992   | GRIN2A    | 4230068 | 0.94 | 8.96E-04 |
| 13167 | PRESY7    | 1940561 | 1.05 | 9.20E-04 |
| 4333  | ABI3BP    | 4490730 | 1.12 | 9.23E-04 |
| 11611 | TMC06     | 5960332 | 1.05 | 9.24E-04 |
| 1197  | HFXR45    | 3140743 | 0.96 | 9.27E-04 |
| 8121  | OLFR5     | 450736  | 0.95 | 9.46E-04 |
| 3724  | KRHD11    | 630400  | 0.95 | 9.50E-04 |
| 24904 | FLT1      | 3830114 | 0.89 | 9.57E-04 |
| 12534 | SC44A2    | 3840600 | 0.97 | 9.60E-04 |
| 1184  | CYP7D     | 3360463 | 1.04 | 9.64E-04 |
| 8446  | CIGR5     | 1260494 | 1.07 | 9.92E-04 |
| 12779 | PPAS5     | 7150711 | 0.95 | 0.001    |
| 5056  | SH0319    | 1780273 | 1.04 | 0.001    |
| 6361  | PTCRA     | 5360672 | 0.94 | 0.001    |
| 12735 | DBR2      | 4900474 | 0.98 | 0.001    |
| 5629  | 5STR3     | 460333  | 0.95 | 0.001    |
| 16450 | BC020259  | 1850048 | 0.94 | 0.001    |
| 4135  | OLFR1045  | 6270681 | 1.06 | 0.001    |
| 21191 | RG53      | 6840192 | 1.04 | 0.001    |
| 16745 | NR2E3     | 3450739 | 0.97 | 0.001    |
| 15513 | JAM2      | 1470215 | 0.96 | 0.001    |
| 3593  | NHRP2     | 3130455 | 1.07 | 0.001    |
| 3353  | SFR1B     | 6960215 | 1.13 | 0.001    |
| 704   | PTFRF     | 60400   | 0.95 | 0.001    |
| 5482  | 1110020C0 | 3130703 | 0.95 | 0.001    |
| 14437 | BC049730  | 4850253 | 0.95 | 0.001    |
| 16968 | OLFR120   | 4280435 | 1.04 | 0.001    |
| 21636 | NDN       | 4490367 | 0.79 | 0.001    |
| 946   | OLFR1344  | 770364  | 0.96 | 0.001    |
| 2440  | TBP1      | 6290463 | 0.94 | 0.001    |
| 582   | IGRF      | 1770292 | 0.96 | 0.001    |
| 25269 | ADC       | 1050521 | 0.97 | 0.001    |
| 8859  | IRC8      | 1660224 | 0.87 | 0.001    |
| 217   | WIP2      | 2190612 | 0.91 | 0.001    |
| 22740 | NDOR1     | 430102  | 0.95 | 0.001    |

|       |           |         |      |          |
|-------|-----------|---------|------|----------|
| 4375  | MAPIK5    | 510538  | 0.94 | 9.86E-06 |
| 6278  | CD30A     | 2490097 | 1.05 | 1.00E-05 |
| 45396 | INTS4     | 870653  | 0.93 | 1.02E-05 |
| 17023 | AP0A2     | 6350537 | 1.09 | 1.04E-05 |
| 10786 | COP7A     | 3890093 | 1.09 | 1.05E-05 |
| 18826 | RGS18     | 460138  | 0.94 | 1.05E-05 |
| 19349 | PP3C      | 6420760 | 1.1  | 1.07E-05 |
| 4014  | BC005764  | 7510553 | 1.09 | 1.08E-05 |
| 9923  | GSDM3A    | 150170  | 1.07 | 1.10E-05 |
| 10460 | T1L8      | 1570301 | 0.91 | 1.11E-05 |
| 13850 | IFNA34    | 3460546 | 1.04 | 1.12E-05 |
| 7804  | CREB1     | 620707  | 0.91 | 1.13E-05 |
| 1145  | OTTMUSGG  | 2350035 | 1.04 | 1.14E-05 |
| 1745  | PER2      | 5860553 | 1.05 | 1.17E-05 |
| 13130 | CEACAM16  | 450113  | 0.93 | 1.17E-05 |
| 3518  | GLRA2     | 20487   | 0.96 | 1.20E-05 |
| 1313  | SYNCRIP   | 6200181 | 1.08 | 1.20E-05 |
| 13050 | 11100576  | 290296  | 0.90 | 1.20E-05 |
| 13899 | FORK1     | 2330273 | 1.0  | 1.21E-05 |
| 3906  | DDP2      | 2120427 | 1.05 | 1.22E-05 |
| 214   | NDUFAS5   | 6560152 | 1.15 | 1.25E-05 |
| 3955  | TLL1      | 2680239 | 1.06 | 1.34E-05 |
| 12659 | SCLC26A9  | 630280  | 0.95 | 1.35E-05 |
| 3717  | CKX16     | 630274  | 0.95 | 1.36E-05 |
| 8748  | TRML      | 4490324 | 0.94 | 1.37E-05 |
| 17420 | CDH4      | 160132  | 0.93 | 1.38E-05 |
| 4223  | LOC100046 | 5670114 | 1.06 | 1.45E-05 |
| 23099 | VZT2      | 3060438 | 0.90 | 1.46E-05 |
| 11389 | OLFR398   | 4730343 | 0.96 | 1.46E-05 |
| 16076 | PHF11     | 1340193 | 1.05 | 1.54E-05 |
| 22134 | LYA2      | 5390095 | 1.08 | 1.56E-05 |
| 11555 | EFPA1     | 2850338 | 1.13 | 1.57E-05 |
| 22259 | NIJ1      | 4210553 | 1.09 | 1.60E-05 |
| 2729  | VPY2C9    | 4730403 | 1.08 | 1.60E-05 |
| 1161  | MYO3A     | 2360753 | 0.92 | 1.64E-05 |
| 514   | RGS5      | 5340592 | 0.94 | 1.64E-05 |
| 23834 | LOC237877 | 7150431 | 0.94 | 1.70E-05 |
| 12945 | ITGB3     | 1740451 | 0.93 | 1.73E-05 |
| 3254  | BTNL2A    | 2940327 | 1.06 | 1.73E-05 |
| 480   | HAH2      | 1240085 | 0.93 | 1.74E-05 |
| 2775  | OTTMUSGG  | 2900339 | 1.07 | 1.99E-05 |
| 17666 | YSG1      | 2060491 | 0.93 | 1.90E-05 |
| 11420 | 6320439K1 | 240156  | 1.09 | 1.81E-05 |
| 22591 | LMBTL3    | 7330685 | 1.07 | 1.82E-05 |
| 20257 | CAPN12    | 3780504 | 1.05 | 1.82E-05 |
| 14557 | PARGC1B   | 6860138 | 0.89 | 1.82E-05 |
| 23442 | GPC1      | 1240563 | 0.94 | 1.88E-05 |
| 1065  | GNA7A     | 4220    |      |          |

|       |          |         |      |       |
|-------|----------|---------|------|-------|
| 2253  | HE56     | 7000634 | 0.90 | 0.001 |
| 3718  | EXT2     | 5890435 | 0.93 | 0.001 |
| 2466  | BC021785 | 2100296 | 0.95 | 0.001 |
| 13104 | INPP4A   | 2690563 | 0.97 | 0.001 |
| 14276 | ARL6P4   | 20037   | 0.91 | 0.001 |
| 1495  | ZBTB46   | 6960639 | 0.95 | 0.001 |
| 11694 | CCDC142  | 2903731 | 1.03 | 0.001 |
| 17091 | TRIM3    | 1070551 | 1.08 | 0.001 |
| 10951 | TAGAP    | 4920639 | 0.96 | 0.001 |
| 3911  | SCNM1    | 160747  | 0.89 | 0.001 |
| 9191  | STARDB   | 7320575 | 0.93 | 0.001 |
| 10697 | SLC26A9  | 4560450 | 1.06 | 0.001 |
| 3510  | CTSW     | 1570133 | 0.96 | 0.001 |
| 16781 | POLE3    | 6650672 | 0.91 | 0.001 |
| 2471  | H1FNT    | 1660646 | 0.95 | 0.001 |

|       |           |         |      |       |
|-------|-----------|---------|------|-------|
| 25599 | TBX20     | 2370358 | 0.94 | 0.001 |
| 447   | OPN15W    | 4890142 | 1.06 | 0.001 |
| 3779  | OLFR164   | 290170  | 0.95 | 0.001 |
| 8150  | PCGF6     | 20025   | 1.09 | 0.001 |
| 4796  | ASB17     | 5340112 | 0.96 | 0.001 |
| 3839  | CCDC102A  | 990372  | 1.06 | 0.001 |
| 21554 | MFR525    | 4490450 | 1.06 | 0.001 |
| 17708 | STMN1     | 3120392 | 0.93 | 0.001 |
| 20080 | CCBL1     | 2850746 | 1.10 | 0.001 |
| 1807  | NTAN1     | 50400   | 1.10 | 0.001 |
| 11345 | BC016201  | 7560551 | 0.96 | 0.001 |
| 19579 | STXP1     | 1300446 | 0.93 | 0.001 |
| 16629 | LOC100045 | 5490279 | 0.94 | 0.001 |
| 11626 | RRBP7     | 6707111 | 0.89 | 0.001 |
| 2835  | SLC24A4   | 5690546 | 0.96 | 0.001 |
| 221   | EPHAs5    | 2370692 | 1.05 | 0.001 |
| 7153  | ARF3      | 5570280 | 0.91 | 0.001 |
| 9809  | TFPOVE2   | 1010703 | 0.85 | 0.001 |
| 4045  | SRF11     | 5560537 | 1.09 | 0.001 |
| 3852  | VRH20     | 3390139 | 1.05 | 0.001 |
| 9162  | TNN3A1    | 70753   | 0.93 | 0.001 |
| 11349 | ZFP78     | 7550092 | 0.94 | 0.001 |
| 5841  | TBX6      | 1230458 | 1.07 | 0.001 |

|       |           |         |      |          |
|-------|-----------|---------|------|----------|
| 10201 | Z310042D1 | 5130593 | 0.95 | 3.20E-05 |
| 46    | C330005M  | 7400678 | 0.95 | 3.20E-05 |
| 1439  | KLHDC1    | 2490475 | 1.09 | 3.26E-05 |
| 17462 | PRPF40B   | 830563  | 1.04 | 3.39E-05 |
| 24762 | GDF9      | 6860349 | 1.05 | 3.31E-05 |
| 772   | LOC100044 | 4880097 | 0.94 | 3.35E-05 |
| 3377  | AURKA     | 380120  | 0.94 | 3.40E-05 |
| 13096 | YUPM1     | 6250754 | 0.94 | 3.45E-05 |
| 15993 | BCAP31    | 3610424 | 1.15 | 3.57E-05 |
| 14455 | PLAUR     | 5720497 | 0.92 | 3.61E-05 |
| 20791 | OLFR476   | 1940193 | 1.08 | 3.66E-05 |
| 19014 | FOX1      | 5550279 | 0.95 | 3.75E-05 |
| 19687 | MFN1      | 6860523 | 0.95 | 3.76E-05 |
| 3538  | IGHMBP2   | 3170180 | 0.95 | 3.77E-05 |
| 12599 | BLM       | 5960189 | 0.93 | 3.77E-05 |
| 3630  | HOXD4     | 4640484 | 0.94 | 3.81E-05 |
| 19573 | LOC100047 | 2600324 | 1.08 | 3.83E-05 |
| 2003  | DLAGA4    | 1580711 | 1.07 | 3.85E-05 |
| 8049  | KATNAL1   | 6350437 | 0.95 | 3.91E-05 |
| 1709  | LOC100048 | 10239   | 0.94 | 4.03E-05 |
| 8399  | G6PDX     | 240653  | 1.07 | 4.08E-05 |
| 15065 | CCL4      | 7150500 | 1.09 | 4.28E-05 |
| 8684  | SLFN1     | 3520746 | 1.07 | 4.29E-05 |
| 9946  | AKR1A4    | 940474  | 0.90 | 4.30E-05 |
| 6910  | CUL4B     | 3310767 | 1.09 | 4.30E-05 |
| 17252 | OLFR593   | 1820253 | 1.05 | 4.35E-05 |
| 10476 | EG240327  | 3400451 | 1.04 | 4.38E-05 |
| 14348 | CIDE8     | 10575   | 1.09 | 4.46E-05 |
| 7175  | LCAT      | 4810072 | 1.11 | 4.52E-05 |
| 18420 | PIHKB     | 1090574 | 0.93 | 4.54E-05 |
| 18247 | HAP1      | 5570601 | 0.95 | 4.58E-05 |
| 15433 | TRPT      | 5420259 | 1.14 | 4.63E-05 |
| 9112  | PPFBP1    | 160577  | 0.95 | 4.65E-05 |
| 17017 | SIGLECH   | 70463   | 1.10 | 4.67E-05 |
| 18694 | OAS1F     | 4230300 | 1.06 | 4.68E-05 |
| 9131  | XPO4      | 6420541 | 0.94 | 4.74E-05 |
| 4060  | SLC25A20  | 1090037 | 1.09 | 4.80E-05 |
| 11856 | 9130422G0 | 2450259 | 0.92 | 4.81E-05 |
| 38    | LOC100046 | 3930047 | 0.95 | 4.82E-05 |
| 16604 | HKM2      | 3400778 | 0.91 | 4.87E-05 |
| 5183  | TMPPRSS1L | 5860427 | 0.94 | 4.89E-05 |
| 24106 | BBS9      | 6270868 | 0.93 | 5.03E-05 |
| 417   | LOC100048 | 2060156 | 1.06 | 5.23E-05 |
| 17000 | ACPP      | 2570280 | 1.06 | 5.33E-05 |
| 5800  | OLFR460   | 3400687 | 0.95 | 5.41E-05 |
| 4282  | C3AR1     | 4670743 | 1.05 | 5.46E-05 |
| 563   | CRY1      | 3290364 | 0.95 | 5.47E-05 |
| 4431  | LOC100044 | 4890370 | 0.95 | 5.55E-05 |
| 4374  | SLK       | 6560477 | 1.07 | 5.61E-05 |
| 3575  | PML       | 4120142 | 1.07 | 5.68E-05 |
| 13843 | PPP2R5C   | 6900400 | 0.95 | 5.81E-05 |
| 925   | ISM14B    | 7610086 | 0.94 | 5.82E-05 |
| 15643 | 4933423M  | 4230739 | 0.95 | 5.93E-05 |
| 437   | GLI3      | 6040707 | 1.04 | 5.93E-05 |
| 21795 | LOC100044 | 2570661 | 1.05 | 5.99E-05 |
| 19311 | ERLIN2    | 5390520 | 0.94 | 6.07E-05 |
| 14837 | 4933439F1 | 2100431 | 1.06 | 6.14E-05 |
| 3352  | KCTD9     | 4880019 | 1.08 | 6.19E-05 |
| 4485  | ZBTB7C    | 2260398 | 1.06 | 6.21E-05 |
| 12995 | ARHGAP19  | 1340047 | 0.96 | 6.26E-05 |
| 20414 | Z310005E1 | 2120243 | 1.10 | 6.41E-05 |
| 23914 | ZGPAT     | 160500  | 1.05 | 6.41E-05 |
| 21456 | ABCA3     | 4040497 | 0.94 | 6.42E-05 |
| 15245 | AKR1B3    | 1340398 | 1.07 | 6.44E-05 |
| 11887 | PSME3     | 2940097 | 0.87 | 6.56E-05 |
| 13799 | PIGL      | 6250288 | 0.94 | 6.57E-05 |
| 19463 | LOC329575 | 2760519 | 0.95 | 6.62E-05 |
| 3062  | UBE2D3    | 1190504 | 1.08 | 6.72E-05 |
| 2862  | BRSK1     | 1850433 | 1.06 | 6.73E-05 |
| 6944  | COPA      | 5560433 | 0.85 | 6.75E-05 |
| 20858 | SMOK3B    | 5910706 | 1.05 | 6.78E-05 |
| 19680 | AZ1       | 5490603 | 0.94 | 7.06E-05 |
| 12400 | EFCAB2    | 2370546 | 0.93 | 7.08E-05 |
| 1908  | TCF11L1   | 3870046 | 0.94 | 7.11E-05 |
| 2490  | DHWL5     | 4670768 | 1.10 | 7.16E-05 |
| 1086  | LOC669251 | 1140709 | 0.96 | 7.16E-05 |
| 2548  | PTPN22    | 5900593 | 0.95 | 7.17E-05 |
| 8967  | P2RX5     | 6330451 | 1.05 | 7.20E-05 |
| 20501 | CEP78     | 730739  | 1.09 | 7.22E-05 |
| 15698 | 1700001O2 | 4610500 | 0.95 | 7.23E-05 |
| 19177 | ORF9      | 1070192 | 0.94 | 7.28E-05 |
| 22191 | SLC25A21  | 2470035 | 1.05 | 7.37E-05 |
| 15397 | ATF2      | 3400360 | 0.95 | 7.39E-05 |
| 9556  | A730017CZ | 830358  | 0.87 | 7.44E-05 |
| 18453 | FZR1      | 160446  | 1.06 | 7.49E-05 |
| 16334 | TNEM49    | 6480458 | 1.07 | 7.52E-05 |
| 16696 | TNEM      | 7120431 | 0.95 | 7.56E-05 |
| 60    | CAPRN1    | 1510201 | 1.08 | 7.70E-05 |
| 5310  | RAD23A    | 1500129 | 0.89 | 7.74E-05 |

|       |           |         |      |          |
|-------|-----------|---------|------|----------|
| 6618  | MAMDC4    | 4610154 | 1.04 | 8.08E-04 |
| 521   | 08FC2A    | 610273  | 1.06 | 8.09E-04 |
| 11626 | MAGEB3    | 770561  | 0.93 | 8.17E-04 |
| 17549 | GSS       | 5390102 | 1.05 | 8.23E-04 |
| 14526 | PLA2G4A   | 1450653 | 0.96 | 8.23E-04 |
| 15127 | MTA1P1B   | 5810332 | 1.25 | 8.27E-04 |
| 73    | AB30025D0 | 2600253 | 0.96 | 8.29E-04 |
| 23040 | RLP19     | 4900703 | 0.89 | 8.33E-04 |
| 734   | SNAP1     | 5670093 | 1.10 | 8.57E-04 |
| 9846  | S100A9    | 1980603 | 0.87 | 8.60E-04 |
| 1570  | CAMP      | 450670  | 0.92 | 8.62E-04 |
| 4600  | CD109     | 360445  | 0.96 | 8.71E-04 |
| 9785  | 4921505C1 | 2450717 | 1.11 | 8.72E-04 |
| 9939  | TCERG1    | 1990575 | 1.04 | 8.90E-04 |
| 9357  | DPY30     | 4230521 | 0.91 | 8.91E-04 |
| 10303 | SLCGA17   | 6770255 | 1.12 | 8.96E-04 |
| 7394  | FNDC7     | 6330152 | 1.06 | 9.05E-04 |
| 2235  | SCAMP1    | 160240  | 1.13 | 9.07E-04 |
| 7680  | GMB15     | 4880521 | 0.96 | 9.12E-04 |
| 24719 | LOC100044 | 1990482 | 0.91 | 9.14E-04 |
| 345   | TRABD     | 2690240 | 1.07 | 9.20E-04 |
| 22842 | OLFR91B   | 4290184 | 0.94 | 9.21E-04 |
| 1341  | NUDT13    | 4070026 | 1.07 | 9.22E-04 |
| 18742 | 1810000O3 | 4150639 | 0.95 | 9.26E-04 |
| 19517 | PPAP2B    | 1660687 | 1.10 | 9.34E-04 |
| 15326 | SPATA16   | 3370497 | 0.96 | 9.39E-04 |
| 19015 | VAT1      | 2900402 | 1.07 | 9.53E-04 |
| 7029  | CZCD3     | 2630669 | 0.96 | 9.58E-04 |
| 7024  | POLE      | 4060441 | 0.97 | 9.64E-04 |
| 5916  | HCST      | 1510497 | 0.95 | 9.71E-04 |
| 7981  | CCDC109A  | 2350538 | 1.09 | 9.73E-04 |
| 7863  | PVR       | 650458  | 1.05 | 9.81E-04 |
| 3935  | MYH4      | 4220474 | 1.04 | 9.85E-04 |
| 689   | IFT140    | 4180411 | 1.05 | 9.95E-04 |
| 24199 | AMN       | 2510743 | 0.84 | 9.96E-04 |
| 16929 | PDLIM7    | 6550609 | 1.08 | 0.001    |
| 72    | FECH      | 3420291 | 1.05 | 0.001    |
| 4578  | LL17D     | 5130682 | 0.94 | 0.001    |
| 1013  | EFCAB8    | 2070561 | 0.94 | 0.001    |
| 22745 | HSD11B1   | 4050369 | 0.88 | 0.001    |
| 21435 | MNRM1     | 1300392 | 0.94 | 0.001    |
| 15435 | OR92421E1 | 5720767 | 0.89 | 0.001    |
| 15162 | PSMB9     | 2450064 | 0.94 | 0.001    |
| 1760  | CRLS1     | 6960332 | 0.90 | 0.001    |
| 14548 | SPRR2A    | 60326   | 0.95 | 0.001    |
| 9294  | RSAM1     | 1190392 | 0.95 | 0.001    |
| 15442 | CD300F    | 3170487 | 1.05 | 0.001    |
| 1788  | LEP       | 6280059 | 0.96 | 0.001    |
| 14667 | GSTA4     | 360348  | 0.93 | 0.001    |
| 10188 | LOC100048 | 6660152 | 1.05 | 0.001    |
| 11912 | PI4KA     | 1260241 | 1.17 | 0.001    |
| 13919 | DUSP2     | 4860379 | 1.05 | 0.001    |
| 24640 | VRBPB     | 4180151 | 0.96 | 0.001    |
| 9370  | TIMM9     | 610075  | 0.94 | 0.001    |
| 5034  | PPL       | 5220397 | 1.05 | 0.001    |
| 9581  | KRT15     | 4570278 | 1.09 | 0.001    |
| 17725 | BAPX1     | 6480097 | 0.95 | 0.001    |
| 3812  | MUP2      | 7050706 | 0.96 | 0.001    |
| 2207  | SMC1A     | 6330102 | 1.03 | 0.001    |
| 7209  | KSR2      | 1770307 | 1.04 | 0.001    |
| 10562 | ZFAND2B   | 2070170 | 0.86 | 0.001    |
| 21157 | PROSAP1P1 | 2030279 | 0.91 | 0.001    |
| 684   | D6ERTD474 | 1240477 | 1.04 | 0.001    |
| 1711  | TTL       | 6380601 | 0.92 | 0.001    |
| 1471  | VRH13     | 1070736 | 1.07 | 0.001    |
| 14333 | EGG54432  | 2760735 | 1.05 | 0.001    |
| 15687 | CRHR1     | 6900114 | 0.94 | 0.001    |
| 19934 | KKR7      | 20192   | 0.94 | 0.001    |
| 13389 | ZFP512    | 3850039 | 1.13 | 0.001    |
| 13908 | BC043301  | 3780270 | 1.05 | 0.001    |
| 17897 | HERC4     | 4220338 | 0.93 | 0.001    |
| 1812  | CALU      | 1410091 | 1.05 | 0.001    |
| 12644 | D630044L2 | 1050386 | 1.05 | 0.001    |
| 7185  | ZDCC      | 1940692 | 1.05 | 0.001    |
| 1158  | NEWNU163  | 4010129 | 1.08 | 0.001    |
| 5838  | MYP17     | 4260053 | 0.90 | 0.001    |
| 8119  | AB30021C2 | 1990168 | 1.05 | 0.001    |
| 11582 | ADD1      | 3850386 | 1.07 | 0.001    |
| 6560  | SFM8T1    | 1110170 | 1.05 | 0.001    |
| 3913  | GSF1      | 360209  | 0.95 | 0.001    |
| 7520  | TIMM44    | 6220450 | 0.92 | 0.001    |
| 16588 | PI4KB     | 2070408 | 0.91 | 0.001    |
| 2898  | OLFR1437  | 6510709 | 1.05 | 0.001    |
| 10791 | TRIM32    | 130433  | 1.22 | 0.001    |
| 3042  | FRG1      | 6940348 | 0.96 | 0.001    |
| 21118 | B930006L0 | 3460368 | 1.16 | 0.001    |
| 2489  | NM3       | 2490307 | 1.04 | 0.001    |
| 10195 | G52       | 20327   | 0.93 | 0.001    |
| 14029 | LCN4      | 5870014 | 0.97 | 0.001    |

|       |           |         |      |          |
|-------|-----------|---------|------|----------|
| 8565  | 2610507B1 | 1190095 | 1.11 | 5.94E-05 |
| 3874  | MESC2     | 6040673 | 1.05 | 6.00E-05 |
| 11072 | 2010106G0 | 270450  | 0.93 | 6.03E-05 |
| 3742  | HERPUD2   | 6620132 | 1.06 | 6.05E-05 |
| 788   | BC12L2    | 1980553 | 0.90 | 6.16E-05 |
| 104   | OLFR1517  | 310100  | 0.94 | 6.18E-05 |
| 19378 | SLC10A7   | 349038  |      |          |

|       |           |         |      |          |
|-------|-----------|---------|------|----------|
| 9691  | TBX20     | 830392  | 0.93 | 7.78E-05 |
| 9899  | ACYP1     | 1820576 | 1.06 | 7.89E-05 |
| 23668 | NBR1      | 6020114 | 0.94 | 7.92E-05 |
| 10907 | PPF1A2    | 3520136 | 0.95 | 8.00E-05 |
| 22980 | GPSM1     | 4010228 | 0.88 | 8.00E-05 |
| 12828 | MDGA2     | 2810349 | 0.89 | 8.04E-05 |
| 13563 | UFSF1     | 1660731 | 1.08 | 8.06E-05 |
| 15577 | PDC05     | 3940392 | 1.08 | 8.06E-05 |
| 1720  | ZSWIM4    | 7510240 | 0.93 | 8.07E-05 |
| 1404  | KCN15     | 6180594 | 1.08 | 8.08E-05 |
| 22880 | BMX       | 3180014 | 1.06 | 8.09E-05 |
| 8753  | HPCAL1    | 4890735 | 0.93 | 8.15E-05 |
| 14288 | MANSCL    | 1260041 | 1.04 | 8.15E-05 |
| 4853  | CYP4F39   | 5570292 | 1.04 | 8.21E-05 |
| 13322 | 1810055E1 | 6550431 | 0.91 | 8.24E-05 |
| 4958  | PRKCZ     | 5820681 | 1.08 | 8.29E-05 |
| 1233  | TRPV1     | 1240278 | 1.06 | 8.41E-05 |
| 5650  | CTPS      | 7100685 | 1.08 | 8.42E-05 |
| 52829 | RWDD2B    | 770372  | 1.08 | 8.50E-05 |
| 19978 | RORB      | 10132   | 0.95 | 8.52E-05 |
| 9032  | PLN       | 1500162 | 1.05 | 8.61E-05 |
| 8759  | MED8      | 6770681 | 1.10 | 8.66E-05 |
| 10043 | 1700073E1 | 650102  | 1.05 | 8.84E-05 |
| 16670 | ESPN      | 4570519 | 1.05 | 8.86E-05 |
| 12279 | 9330182L0 | 7210128 | 1.04 | 8.88E-05 |
| 6669  | GM1082    | 3800403 | 1.04 | 8.91E-05 |
| 4573  | RAB11F1P5 | 6200333 | 0.95 | 9.01E-05 |
| 21324 | ALPK3     | 4260274 | 1.09 | 9.05E-05 |
| 7581  | TBX2      | 2760601 | 1.05 | 9.11E-05 |
| 450   | AGBL2     | 4480097 | 0.93 | 9.11E-05 |
| 19318 | VRRC16    | 10685   | 0.96 | 9.44E-05 |
| 11829 | TMED4     | 580215  | 0.92 | 9.52E-05 |
| 6700  | OLFR1089  | 1470592 | 1.04 | 9.53E-05 |
| 2545  | CTRC      | 2320333 | 0.95 | 9.55E-05 |
| 4992  | ZF3A2     | 2190750 | 1.08 | 9.66E-05 |
| 1593  | ZFP106    | 2680687 | 0.93 | 9.73E-05 |
| 3781  | DDT       | 1990731 | 0.95 | 9.81E-05 |
| 13474 | POLR2G    | 7330594 | 1.10 | 9.86E-05 |
| 5495  | ATP6V1B1  | 5890075 | 0.96 | 9.86E-05 |
| 15864 | HAMP2     | 7330482 | 1.06 | 9.87E-05 |
| 14370 | CLSPN     | 6980315 | 1.05 | 1.00E-04 |
| 21485 | WCO1      | 780301  | 0.95 | 1.00E-04 |
| 11731 | H2-T10    | 4900722 | 1.05 | 1.01E-04 |
| 9579  | ZFP652    | 10593   | 1.05 | 1.01E-04 |
| 9154  | RPS6KA1   | 5860356 | 1.12 | 1.02E-04 |
| 24274 | SETD8     | 1690114 | 0.94 | 1.02E-04 |
| 21466 | COX6A2    | 2470356 | 1.16 | 1.05E-04 |
| 21073 | PHEX      | 2340411 | 0.95 | 1.05E-04 |
| 6304  | MSRB2     | 5960341 | 0.90 | 1.05E-04 |
| 8716  | LST1      | 5860154 | 1.08 | 1.06E-04 |
| 14035 | FZD3      | 1410025 | 0.96 | 1.06E-04 |
| 20581 | OLFR96    | 1400471 | 0.95 | 1.07E-04 |
| 10301 | EHWMT1    | 1300521 | 0.94 | 1.07E-04 |
| 22834 | MED24     | 610040  | 0.87 | 1.08E-04 |
| 2436  | TPD52L2   | 1990017 | 1.10 | 1.09E-04 |
| 9588  | SNIP1     | 1580537 | 1.09 | 1.11E-04 |
| 2389  | 1700010M  | 2630646 | 0.96 | 1.12E-04 |
| 49    | WDFY3     | 6250050 | 0.91 | 1.13E-04 |
| 22817 | ALDOC     | 5550470 | 0.89 | 1.14E-04 |
| 9048  | PATL1     | 360215  | 0.87 | 1.16E-04 |
| 10095 | GATAD1    | 3290458 | 1.09 | 1.18E-04 |
| 4532  | KIF18A    | 3990296 | 0.95 | 1.19E-04 |
| 9169  | CDSN      | 60324   | 0.94 | 1.20E-04 |
| 5063  | FLA       | 5860253 | 1.05 | 1.20E-04 |
| 329   | TCFAP2A   | 5890725 | 0.95 | 1.22E-04 |
| 655   | BCLAF1    | 4070392 | 0.96 | 1.22E-04 |
| 10832 | SLC30A10  | 6770202 | 0.94 | 1.22E-04 |
| 280   | ZBT8BOS   | 4040253 | 1.06 | 1.25E-04 |
| 19194 | TUBB3     | 3130458 | 0.94 | 1.27E-04 |
| 12780 | RELL2     | 4180152 | 1.14 | 1.28E-04 |
| 23519 | PIM2      | 6020246 | 1.06 | 1.28E-04 |
| 7303  | LENEP     | 5270678 | 0.96 | 1.28E-04 |
| 16439 | POLD4     | 5910619 | 1.10 | 1.29E-04 |
| 23096 | ABLIM2    | 6520408 | 1.07 | 1.30E-04 |
| 3963  | HIBADH    | 770593  | 1.12 | 1.30E-04 |
| 13977 | THP01     | 3060543 | 0.92 | 1.32E-04 |
| 21128 | IGBP1     | 2470064 | 1.11 | 1.32E-04 |
| 4127  | VIP       | 2940538 | 0.95 | 1.34E-04 |
| 11980 | PLEC1     | 360014  | 0.93 | 1.35E-04 |
| 5609  | NBL1      | 3850255 | 0.88 | 1.36E-04 |
| 2916  | TRIP12    | 6280520 | 0.92 | 1.37E-04 |
| 4416  | LNPEP     | 3390601 | 0.95 | 1.37E-04 |
| 15863 | IFI202B   | 650601  | 0.95 | 1.37E-04 |
| 16561 | SFXN4     | 7650243 | 1.05 | 1.38E-04 |
| 821   | BCE       | 2760327 | 1.07 | 1.38E-04 |
| 2501  | MEST      | 3190408 | 1.05 | 1.39E-04 |
| 18554 | 111000GGG | 4640743 | 1.07 | 1.40E-04 |
| 18433 | ADAM23    | 3940286 | 0.90 | 1.41E-04 |
| 440   | 2010005H1 | 520035  | 1.04 | 1.41E-04 |

|       |           |         |      |       |
|-------|-----------|---------|------|-------|
| 2361  | PPARG     | 2320402 | 0.93 | 0.001 |
| 8162  | D9ERTD402 | 2340390 | 0.90 | 0.001 |
| 20529 | MRLP54    | 1070358 | 0.89 | 0.001 |
| 23128 | LOC100041 | 7400400 | 1.06 | 0.001 |
| 16466 | OLFR1273  | 7160519 | 1.04 | 0.001 |
| 6662  | RFXDC1    | 1450446 | 0.92 | 0.001 |
| 15143 | MSA46B    | 3610286 | 0.93 | 0.001 |
| 3509  | POLM      | 3440301 | 1.05 | 0.001 |
| 516   | HOOK1     | 2000328 | 0.95 | 0.001 |
| 1265  | 6430527G1 | 1070187 | 0.94 | 0.001 |
| 4411  | RABGGTA   | 4900692 | 0.94 | 0.001 |
| 12870 | SLC38A4   | 5340386 | 1.04 | 0.001 |
| 545   | ASCC3L1   | 5810170 | 0.94 | 0.001 |
| 3944  | NR2F2     | 5860709 | 1.08 | 0.001 |
| 6293  | RANBP17   | 4150086 | 1.07 | 0.001 |
| 21340 | CEP72     | 5570047 | 1.06 | 0.001 |
| 2951  | LIF       | 6940037 | 0.89 | 0.001 |
| 8465  | PIPL1     | 6760647 | 1.07 | 0.001 |
| 133   | CLOCK     | 4810445 | 1.06 | 0.001 |

|       |           |         |      |          |
|-------|-----------|---------|------|----------|
| 21287 | GRAMD2    | 70435   | 1.05 | 1.43E-04 |
| 12902 | CLCA5     | 1740167 | 0.94 | 1.45E-04 |
| 8621  | ANKRD49   | 7150553 | 0.93 | 1.46E-04 |
| 6086  | A830018L1 | 4890259 | 1.06 | 1.47E-04 |
| 16965 | ESPN      | 6620544 | 1.04 | 1.51E-04 |
| 20773 | CHRM2     | 2370259 | 1.05 | 1.52E-04 |
| 12404 | IVNS1ABP  | 650148  | 1.08 | 1.55E-04 |
| 607   | OTTMUSG   | 6480152 | 1.05 | 1.56E-04 |
| 6902  | PSP       | 2650338 | 0.96 | 1.56E-04 |
| 16424 | ACTN3     | 4860577 | 1.06 | 1.57E-04 |
| 16847 | AU017455  | 6520626 | 0.95 | 1.58E-04 |
| 7878  | KCNH6     | 6760504 | 1.06 | 1.58E-04 |
| 16666 | ZFP354B   | 2750563 | 1.07 | 1.58E-04 |
| 15261 | TBPL2     | 6650484 | 1.06 | 1.58E-04 |
| 1603  | CHMP7     | 5890390 | 1.07 | 1.60E-04 |
| 12794 | PDCL2     | 4050192 | 0.94 | 1.61E-04 |
| 23317 | 1700018C1 | 5490215 | 0.94 | 1.61E-04 |
| 21765 | CEP184    | 1190300 | 0.94 | 1.61E-04 |
| 5177  | ZFP787    | 2140768 | 0.93 | 1.61E-04 |
| 3781  | DDT       | 1990731 | 0.95 | 1.62E-04 |
| 287   | TPRKB     | 3390538 | 1.11 | 1.62E-04 |
| 20000 | ABC8      | 650438  | 0.95 | 1.62E-04 |
| 629   | NLRP1A    | 5860519 | 0.95 | 1.62E-04 |
| 18699 | ENTPD8    | 5420482 | 0.97 | 1.65E-04 |
| 21069 | AFMID     | 6040278 | 0.96 | 1.65E-04 |
| 22862 | CE51      | 6480397 | 0.96 | 1.66E-04 |
| 12736 | MXRA8     | 3940435 | 0.95 | 1.67E-04 |
| 12628 | SP9       | 5390048 | 0.94 | 1.69E-04 |
| 16632 | CKS2      | 6220309 | 1.03 | 1.69E-04 |
| 2879  | KRT17     | 1780341 | 0.93 | 1.70E-04 |
| 8899  | RPS6K1    | 2750195 | 1.05 | 1.71E-04 |
| 20360 | RNF17     | 7610379 | 1.05 | 1.72E-04 |
| 10980 | MRP510    | 7560465 | 1.05 | 1.73E-04 |
| 8554  | UPK3B     | 4040243 | 0.94 | 1.75E-04 |
| 15363 | ATPB03    | 7000403 | 1.08 | 1.76E-04 |
| 6311  | MAML1     | 7650674 | 1.05 | 1.79E-04 |
| 18239 | LOC100047 | 840253  | 0.96 | 1.82E-04 |
| 8676  | P4HA2     | 5960754 | 0.94 | 1.82E-04 |
| 639   | DUX1A5    | 2970240 | 1.07 | 1.82E-04 |
| 16560 | 2810416G2 | 6580768 | 0.95 | 1.83E-04 |
| 20356 | SCMH1     | 3710070 | 1.06 | 1.84E-04 |
| 100   | POE3B     | 1900001 | 1.06 | 1.87E-04 |
| 18722 | THAP11    | 6760653 | 0.90 | 1.89E-04 |
| 21232 | FAIM2     | 6980414 | 1.07 | 1.89E-04 |
| 4369  | FGFR1OP   | 6100273 | 0.96 | 1.90E-04 |
| 144   | EYA3      | 5220181 | 1.06 | 1.90E-04 |
| 619   | 1190020I1 | 7000114 | 0.96 | 1.90E-04 |
| 1265  | 6430527G1 | 1070187 | 0.94 | 1.91E-04 |
| 11396 | ASNS      | 586070  | 1.05 | 1.92E-04 |
| 13585 | WDR45L    | 130402  | 0.93 | 1.93E-04 |
| 23155 | UGT2B36   | 840431  | 0.96 | 1.95E-04 |
| 2013  | SPRR2F    | 2760669 | 0.96 | 1.96E-04 |
| 6402  | NSAMT1    | 7380717 | 1.13 | 1.96E-04 |
| 18415 | PRDX6-RS1 | 1940220 | 1.06 | 1.97E-04 |
| 23773 | UBE2T     | 3190403 | 0.93 | 1.98E-04 |
| 7709  | EG654453  | 6180259 | 0.95 | 1.98E-04 |
| 7339  | HN1L      | 50609   | 1.04 | 2.00E-04 |
| 2059  | GSS       | 3850167 | 1.06 | 2.02E-04 |
| 807   | V1RD4     | 7210397 | 1.05 | 2.04E-04 |
| 3972  | PLA2G2A   | 5050524 | 0.96 | 2.05E-04 |
| 3934  | GPR61     | 7000619 | 0.95 | 2.06E-04 |
| 337   | F9        | 3120403 | 1.06 | 2.11E-04 |
| 1960  | A430107D2 | 670050  | 1.06 | 2.13E-04 |
| 5512  | CAD       | 2760608 | 0.95 | 2.13E-04 |
| 8100  | FR3       | 4280391 | 0.97 | 2.14E-04 |
| 5037  | STX1B1    | 70253   | 0.96 | 2.14E-04 |
| 7153  | NFKBIE    | 990048  | 0.95 | 2.14E-04 |
| 14585 | PTPN2     | 2140673 | 1.04 | 2.16E-04 |
| 20045 | WDR41     | 3940692 | 1.08 | 2.17E-04 |
| 10116 | 4933407NG | 6580274 | 1.06 | 2.18E-04 |
| 13254 | PIRA      | 3520039 | 1.04 | 2.19E-04 |
| 9630  | CCL2      | 5130156 | 0.95 | 2.28E-04 |
| 12842 | FBX08     | 1450433 | 1.04 | 2.33E-04 |
| 13118 | PKNOX1    | 3890139 | 1.06 | 2.36E-04 |
| 3289  | RADC5     | 20431   | 1.06 | 2.37E-04 |
| 24789 | BC006779  | 6420170 | 0.95 | 2.37E-04 |
| 20825 | WDR93     | 2190709 | 1.07 | 2.39E-04 |
| 16911 | SLFN9     | 3890075 | 1.06 | 2.41E-04 |
| 9584  | TMEM70    | 1990239 | 1.05 | 2.41E-04 |
| 12169 | FTMT      | 3060730 | 0.96 | 2.43E-04 |
| 9698  | CLCN6     | 3140162 | 1.05 | 2.43E-04 |
| 22298 | THBD      | 1230767 | 0.95 | 2.46E-04 |
| 2370  | AIM2      | 150095  | 0.95 | 2.47E-04 |
| 21446 | 5730419H5 | 1740020 | 0.91 | 2.47E-04 |
| 23651 | FIGL2     | 2340242 | 1.04 | 2.48E-04 |
| 4019  | NPCD      | 4280692 | 1.08 | 2.48E-04 |
| 8407  | PPPAC     | 6270735 | 0.94 | 2.50E-04 |
| 22691 | ACVNL1    | 5860341 | 0.95 | 2.50E-04 |
| 19165 | SNAP3     | 6860082 | 1.05 | 2.51E-04 |

|       |           |         |      |          |
|-------|-----------|---------|------|----------|
| 16320 | DNAJA2    | 1690709 | 1.06 | 1.44E-04 |
| 13160 | BC003236  | 6100719 | 1.05 | 1.46E-04 |
| 16436 | GNAT2     | 4070259 | 0.95 | 1.46E-04 |
| 17542 | HNRPH2    | 1170735 | 0.94 | 1.49E-04 |
| 5450  | GLT6D1    | 7160451 | 0.96 | 1.49E-04 |
| 17609 | MS4A3     | 7200142 | 1.06 | 1.50E-04 |
| 4680  | DSTN      | 4301332 | 0.87 | 1.52E-04 |
| 5348  | SH3MD4    | 5670468 | 0.95 | 1.53E-04 |
| 517   | NIP7      | 430484  | 1.11 | 1.55E-04 |
| 7332  | BFBP2     | 4860427 | 1.05 | 1.56E-04 |
| 4612  | 2810046L0 | 2070736 | 0.91 | 1.58E-04 |
| 14500 | RRP1B     | 6650431 | 1.04 | 1.59E-04 |
| 4002  | A030013NC | 6770639 | 0.95 | 1.61E-04 |
| 5117  | EDAR      | 7510088 | 0.95 | 1.61E-04 |
| 11297 | HDFL1     | 5890156 | 1.05 | 1.62E-04 |
| 18317 | SRM       | 3310347 | 0.90 | 1.62E-04 |
| 23567 | OLFR166   | 5720703 | 0.95 | 1.63E-04 |
| 10261 | KARS      | 3310379 | 1.10 | 1.63E-04 |
| 24072 | OLFR1126  | 4290053 | 1.05 | 1.64E-04 |
| 8902  | OLFR1061  | 6180176 | 1.06 | 1.65E-04 |
| 15403 | LOC100047 | 5550348 | 0.91 | 1.67E-04 |
| 13522 | USP5      | 6330746 | 1.06 | 1.71E-04 |
| 19759 | WBP11     | 5870059 | 0.88 | 1.72E-04 |
| 7851  | EPB7.2    | 6400148 | 0.95 | 1.74E-04 |
| 7008  | EIF5B     | 940044  | 1.05 | 1.74E-04 |
| 10004 | GATM      | 1690561 | 1.05 | 1.76E-04 |
| 3692  | COX7A1    | 3360270 | 1.13 | 1.76E-04 |
| 20096 | SEC63     | 5720082 | 0.92 | 1.77E-04 |
| 2032  | NR5A1     | 3830039 | 0.94 | 1.77E-04 |
| 8058  | EXOC1     | 1240189 | 0.90 | 1.80E-04 |
| 20429 | EG328839  | 2630307 | 0.95 | 1.81E-04 |
| 21525 | OLFR876   | 7050543 | 1.05 | 1.81E-04 |
| 15530 | CHMP1B    | 2900594 | 0.92 | 1.83E-04 |
| 2902  | ZCCHC8    | 3710273 | 0.95 | 1.84E-04 |
| 17968 | TUBA3B    | 2970630 | 1.04 | 1.85E-04 |
| 8907  | CLEC1B    | 2710008 | 1.05 | 1.85E-04 |
| 2771  | NNAT      | 2360541 | 0.94 | 1.86E-04 |
| 10736 | SCPEP1    | 1030102 | 1.07 | 1.86E-04 |
| 18760 | MEI1      | 2680682 | 1.04 | 1.89E-04 |
| 23160 | PLXND1    | 4050079 | 1.06 | 1.89E-04 |
| 23811 | AV249152  | 470037  | 0.95 | 1.90E-04 |
| 6203  | ERMAP     | 1340176 | 0.96 | 1.91E-04 |
| 19095 | ZFP87     | 1820307 | 1.06 | 1.94E-04 |
| 4317  | MPHOSPH1  | 1710593 | 1.05 | 1.94E-04 |
| 889   | RXFP4     | 4780156 | 0.94 | 1.96E-04 |
| 19072 | OLFR378   | 2710692 | 0.96 | 1.98E-04 |
| 13765 | TRAPPC3   | 4670224 | 1.10 | 1.99E-04 |
| 2166  | ST6GALNAC | 6560692 | 0.94 | 2.00E-04 |
| 7582  | LRMP      | 5390064 | 1.05 | 2.01E-04 |
| 2961  | UPB1      | 4040376 | 0.96 | 2.02E-04 |
| 16957 | TSPAN3    | 6840411 | 0.97 | 2.04E-04 |
| 19154 | MMMP7     | 7650735 | 1.05 | 2.05E-04 |
| 14253 | LRTM2     | 1300609 | 1.05 | 2.06E-04 |
| 1766  | ARHGAP30  | 4250544 | 1.04 | 2.06E-04 |
| 1174  | TMEM183A  | 2750673 | 0.94 | 2.07E-04 |
| 18596 | BMP2K     | 5560435 | 1.04 | 2.07E-04 |
| 13134 | MSR2      | 6130746 | 1.07 | 2.08E-04 |
| 25190 | MS4A1     | 1780187 | 1.05 | 2.12E-04 |
| 4632  | PACSIN1   | 2190241 | 0.92 | 2.12E-04 |
| 1405  | CRBN      | 4860064 | 0.93 | 2.13E-04 |
| 2590  | OLFR961   | 1850370 | 1.06 | 2.14E-04 |
| 2606  | RBM4      | 6590204 | 1.08 | 2.18E-04 |
| 14391 | GM776     | 2140446 | 0.93 | 2.22E-04 |
| 23856 | KLRB1     | 6060326 | 0.95 | 2.23E-04 |
| 2140  | YLRH5     | 6590386 | 0.96 | 2.23E-04 |
| 25315 | FOXO2     | 5260291 | 0.95 | 2.33E-04 |
| 16573 | RPTN      | 2230288 | 1.05 | 2.33E-04 |
| 18711 | SLC12A4   | 5360072 | 1.05 | 2.34E-04 |
| 19281 | FEM1B     | 5090017 | 0.89 | 2.35E-04 |
| 11605 | EG434280  | 2190184 | 0.95 | 2.35E-04 |
| 14996 | RIPK5     | 2030093 | 0.95 | 2.37E-04 |
| 17979 | WIZ       | 6550356 | 0.94 | 2.38E-04 |
| 19228 | DDX3Y     | 6510477 | 0.86 | 2.38E-04 |
| 7945  | NUP153    | 7550377 | 0.95 | 2.38E-04 |
| 397   | ASPH      | 7210110 | 1.05 | 2.39E-04 |
| 13288 | TWIST2    | 6420729 | 1.06 | 2.40E-04 |
| 10093 | KCNS1     | 3310646 | 1.09 | 2.40E-04 |
| 17888 | CSA       | 4810402 | 0.94 | 2.42E-04 |
| 722   | SAPS3     | 460113  | 0.88 | 2.44E-04 |
| 27    | LCORL     | 2470343 | 0.96 | 2.45E-04 |
| 1874  | SLC44A2   | 2190632 | 0.93 | 2.48E-04 |
| 22561 | SPCS3     | 3780717 | 1.11 | 2.50E-04 |
| 15478 | CD28      | 7320161 | 1.05 | 2.53E-04 |
| 24592 | TLL1      | 7100180 | 1.07 | 2.55E-04 |
| 17385 | 91302180Z | 3520278 | 0.95 | 2.57E-04 |
| 6141  | RPE       | 610377  | 0.91 | 2.58E-04 |
| 21035 | NLHF      | 1301349 | 1.06 | 2.59E-04 |
| 25189 | SIRT3     | 5550554 | 1.21 | 2.60E-04 |
| 64    | BC057371  | 5090653 | 1.05 | 2.61E-04 |

|         |            |         |      |          |
|---------|------------|---------|------|----------|
| 22227   | 181002981  | 6760291 | 1.06 | 2.52E-04 |
| 1913    | HEMGN      | 6450576 | 0.96 | 2.54E-04 |
| 8740    | ADARB2     | 3710431 | 1.07 | 2.55E-04 |
| 3253    | OLFR568    | 3450398 | 0.97 | 2.55E-04 |
| 16902   | OLFR1515   | 1570484 | 0.96 | 2.55E-04 |
| 1897    | SLC7A2     | 50722   | 0.94 | 2.57E-04 |
| 3186    | KATNAL2    | 3060750 | 1.07 | 2.58E-04 |
| 5007    | H2-EB1     | 520072  | 1.09 | 2.61E-04 |
| 9102    | PADI1      | 1690201 | 0.97 | 2.62E-04 |
| 13324   | LOC100047  | 1780053 | 0.89 | 2.64E-04 |
| 19924   | OLFR49     | 3290286 | 0.93 | 2.64E-04 |
| 20422   | CCL20      | 4290523 | 0.92 | 2.68E-04 |
| 8311    | PDGFB      | 7320500 | 1.05 | 2.68E-04 |
| 3996    | VIM        | 1690091 | 0.90 | 2.69E-04 |
| 803     | PEX3       | 3870349 | 1.17 | 2.69E-04 |
| 1397    | LOC433632  | 6350397 | 1.05 | 2.73E-04 |
| 5294    | CCDC42     | 1740746 | 0.97 | 2.74E-04 |
| 14005   | AS30098C1  | 1190368 | 0.96 | 2.74E-04 |
| 2443    | GSTP1      | 4290040 | 1.03 | 2.76E-04 |
| 1908    | TCP111     | 3870646 | 0.95 | 2.81E-04 |
| 1826    | STXBPA     | 6280066 | 1.06 | 2.81E-04 |
| 21859   | UTS2       | 7380010 | 1.04 | 2.82E-04 |
| 16769   | CYHR1      | 5670373 | 1.06 | 2.85E-04 |
| 21107   | ALDH9A1    | 5050603 | 1.04 | 2.85E-04 |
| 2664    | MAP3K8     | 2970598 | 0.95 | 2.87E-04 |
| 16090   | CRYAB      | 5310598 | 1.19 | 2.88E-04 |
| 23542   | CCDC50     | 5360653 | 0.94 | 2.90E-04 |
| 13399   | PLCD3      | 1240039 | 0.93 | 2.92E-04 |
| 9549    | ASAH3L     | 1470386 | 1.14 | 2.93E-04 |
| 20268   | PTCD3      | 990326  | 1.05 | 2.94E-04 |
| 20371   | BSND       | 5220451 | 0.95 | 2.95E-04 |
| 8303    | CDC25B     | 2470360 | 1.06 | 2.99E-04 |
| 4875    | DKKL1      | 7200600 | 0.94 | 3.03E-04 |
| 20779   | SOX6       | 1300717 | 1.04 | 3.04E-04 |
| 18868   | ADAM8      | 7200037 | 1.05 | 3.08E-04 |
| 4894    | ACPL2      | 6060630 | 0.94 | 3.09E-04 |
| 2542    | SLC2A5     | 450020  | 0.94 | 3.10E-04 |
| 5150    | HCFC1R1    | 1030768 | 0.96 | 3.12E-04 |
| 14120   | GRIA1      | 4830670 | 0.87 | 3.13E-04 |
| 10200   | AKR7A5     | 3180068 | 0.93 | 3.17E-04 |
| 8634    | SLC35C2    | 10204   | 0.90 | 3.18E-04 |
| 17685   | POU3FA     | 6120646 | 0.93 | 3.19E-04 |
| 17708   | STMN1      | 3120292 | 0.93 | 3.19E-04 |
| 6843    | E130319B1  | 6550070 | 1.05 | 3.20E-04 |
| 24601   | KRT73      | 3190402 | 0.94 | 3.20E-04 |
| 545     | ASC3L1     | 5810170 | 0.93 | 3.23E-04 |
| 22574   | CXCL12     | 1470148 | 1.04 | 3.26E-04 |
| 7295    | ITPR2      | 5820291 | 0.95 | 3.28E-04 |
| 4122    | IFIT81     | 5080347 | 1.06 | 3.29E-04 |
| 15794   | HTRA1      | 6220703 | 1.11 | 3.32E-04 |
| 20275   | RAP2C      | 3460053 | 0.94 | 3.38E-04 |
| 2303    | IGSF21     | 6860537 | 0.89 | 3.39E-04 |
| 1170438 | LOC677205  | 1170438 | 1.06 | 3.40E-04 |
| 19056   | DTNA       | 7380255 | 1.06 | 3.43E-04 |
| 488     | 3110050N2  | 610129  | 1.09 | 3.44E-04 |
| 15848   | 2310014L1  | 3840475 | 0.96 | 3.45E-04 |
| 5716    | SCARAS     | 160377  | 0.94 | 3.46E-04 |
| 17280   | GM467      | 2350497 | 0.95 | 3.47E-04 |
| 19401   | BLK        | 3140491 | 0.92 | 3.48E-04 |
| 876     | APOC2      | 5390240 | 0.96 | 3.49E-04 |
| 24255   | TM95F3     | 2350678 | 0.93 | 3.53E-04 |
| 4381    | ZBTB9      | 3130072 | 0.95 | 3.55E-04 |
| 13860   | LOC100047  | 3460674 | 1.03 | 3.56E-04 |
| 24458   | GMMT       | 1110288 | 0.93 | 3.61E-04 |
| 14007   | NANOG      | 5090661 | 0.96 | 3.62E-04 |
| 18950   | ALB        | 7400647 | 0.92 | 3.62E-04 |
| 25519   | ADD2       | 1230253 | 0.96 | 3.67E-04 |
| 17622   | 1700025D0  | 4780719 | 0.96 | 3.69E-04 |
| 17475   | C1QTNF3    | 5260672 | 0.95 | 3.72E-04 |
| 3865    | USP9Y      | 4880397 | 1.05 | 3.73E-04 |
| 11270   | 9630028B1  | 4220458 | 1.07 | 3.75E-04 |
| 17050   | CENPI      | 6110646 | 0.96 | 3.76E-04 |
| 2916    | TRIP12     | 6280520 | 0.93 | 3.83E-04 |
| 5777    | PKP3       | 5260731 | 0.95 | 3.84E-04 |
| 18173   | MCF2       | 7570397 | 1.05 | 3.84E-04 |
| 1886    | MFS58      | 7150670 | 1.05 | 3.87E-04 |
| 5334    | HMG82      | 5290729 | 0.95 | 3.88E-04 |
| 10468   | TNFSF12-IT | 6100220 | 0.93 | 3.91E-04 |
| 3932    | PLEKH7A    | 5690368 | 0.94 | 3.92E-04 |
| 1254    | CADPS2     | 1090220 | 1.08 | 3.93E-04 |
| 21056   | BC061039   | 6280086 | 1.05 | 3.93E-04 |
| 10606   | ZFP609     | 7320687 | 0.95 | 3.94E-04 |
| 18605   | AV074887   | 2450020 | 1.04 | 3.94E-04 |
| 13833   | IGHMBP2    | 3060739 | 1.04 | 3.95E-04 |
| 5538    | TMPO       | 5390494 | 0.96 | 3.95E-04 |
| 11402   | GZMM       | 50253   | 0.94 | 3.96E-04 |
| 21000   | WRNIP1     | 4670819 | 1.06 | 3.97E-04 |
| 13026   | GNAS       | 1090132 | 0.94 | 3.98E-04 |
| 23921   | MAZ        | 5560372 | 1.08 | 3.98E-04 |

|       |            |         |      |          |
|-------|------------|---------|------|----------|
| 15914 | NDUFS2     | 4180379 | 1.06 | 2.63E-04 |
| 5622  | CCL25      | 1780307 | 1.07 | 2.65E-04 |
| 7657  | CLTA       | 4060491 | 0.95 | 2.68E-04 |
| 1266  | GPR45      | 7040114 | 0.95 | 2.69E-04 |
| 14053 | TAS2R143   | 3370561 | 1.05 | 2.71E-04 |
| 1895  | DUSP23     | 670681  | 1.08 | 2.71E-04 |
| 915   | FNDC7      | 7150133 | 1.0  | 2.73E-04 |
| 10621 | SNCAIP     | 840148  | 0.95 | 2.75E-04 |
| 3568  | HSPA4      | 4050630 | 0.96 | 2.77E-04 |
| 15235 | SRA1       | 2060072 | 1.09 | 2.81E-04 |
| 978   | GABPB1     | 4070598 | 0.94 | 2.82E-04 |
| 21796 | Z310037124 | 2940152 | 0.91 | 2.84E-04 |
| 6139  | V1RD17     | 6270129 | 1.05 | 2.84E-04 |
| 21994 | PCSK1N     | 3610039 | 1.16 | 2.86E-04 |
| 1158  | DGWSU163   | 4010129 | 1.06 | 2.86E-04 |
| 10948 | REXO1      | 3450228 | 1.04 | 2.87E-04 |
| 6641  | STAB1      | 2490286 | 0.94 | 2.91E-04 |
| 17778 | SUC2A9     | 3130228 | 1.05 | 2.91E-04 |
| 18225 | REPE1      | 4760630 | 0.97 | 2.93E-04 |
| 9726  | EFTUD1     | 2680332 | 0.94 | 2.94E-04 |
| 24216 | LIPH       | 380332  | 1.04 | 2.95E-04 |
| 8824  | HUS1       | 1570079 | 1.09 | 2.96E-04 |
| 296   | RFFL       | 6860398 | 1.05 | 2.96E-04 |
| 10330 | KCTD10     | 2060612 | 0.97 | 3.00E-04 |
| 4859  | RAB37      | 2000056 | 0.93 | 3.00E-04 |
| 8835  | WNT2       | 4830008 | 1.08 | 3.01E-04 |
| 9463  | ZFP288     | 4670280 | 1.08 | 3.02E-04 |
| 477   | ADCK2      | 2370102 | 1.04 | 3.02E-04 |
| 7015  | GNPTG      | 4890343 | 1.07 | 3.02E-04 |
| 4540  | CSY10      | 2140349 | 1.07 | 3.03E-04 |
| 3738  | BOLA3      | 1430176 | 1.13 | 3.03E-04 |
| 26    | TNFSF11    | 2480255 | 1.07 | 3.04E-04 |
| 7318  | NSMCE2     | 2680180 | 1.05 | 3.05E-04 |
| 178   | CETN4      | 6980022 | 0.93 | 3.05E-04 |
| 3915  | MTAP       | 4050328 | 1.05 | 3.08E-04 |
| 8831  | SNUPN      | 6840523 | 1.08 | 3.08E-04 |
| 5605  | DMN        | 1740364 | 0.90 | 3.10E-04 |
| 6633  | PFDN1      | 1660356 | 0.96 | 3.10E-04 |
| 685   | 4732418C0  | 620730  | 1.07 | 3.13E-04 |
| 19859 | PSG19      | 4290482 | 1.07 | 3.15E-04 |
| 4838  | GLT8D1     | 2190587 | 0.92 | 3.15E-04 |
| 740   | CMYA1      | 4900279 | 0.96 | 3.18E-04 |
| 10132 | ADRB3      | 7560349 | 1.06 | 3.20E-04 |
| 25623 | PNKD       | 3460731 | 1.05 | 3.21E-04 |
| 12720 | PRR19      | 730440  | 1.04 | 3.21E-04 |
| 1911  | EFNB3      | 1570433 | 1.07 | 3.21E-04 |
| 1815  | CREB1      | 130707  | 0.96 | 3.25E-04 |
| 945   | RAD18      | 4390632 | 0.95 | 3.26E-04 |
| 12519 | URM1       | 2450678 | 1.11 | 3.28E-04 |
| 211   | ARFGAP1    | 6100537 | 0.95 | 3.28E-04 |
| 6936  | PCYOX1L    | 3870092 | 1.06 | 3.29E-04 |
| 23088 | TMEM53     | 990239  | 0.94 | 3.32E-04 |
| 25391 | LOC100046  | 2350286 | 0.93 | 3.33E-04 |
| 15283 | FMOD       | 6110520 | 1.04 | 3.34E-04 |
| 10277 | EPBA1L1    | 7400491 | 1.13 | 3.35E-04 |
| 21015 | MFGE8      | 2120286 | 1.13 | 3.36E-04 |
| 20749 | ENDOGL1    | 3310368 | 1.08 | 3.38E-04 |
| 7609  | BRUNOL4    | 3290670 | 0.92 | 3.41E-04 |
| 1775  | LOC433721  | 2510541 | 1.06 | 3.42E-04 |
| 1443  | CRLS1      | 3450154 | 1.06 | 3.43E-04 |
| 25602 | TAF1C      | 60255   | 1.04 | 3.56E-04 |
| 25358 | RBM10      | 1980554 | 1.05 | 3.57E-04 |
| 14491 | ANXA13     | 3610521 | 1.05 | 3.57E-04 |
| 13225 | SUC3F3     | 5130424 | 0.91 | 3.58E-04 |
| 3805  | APEX2      | 4050475 | 0.96 | 3.59E-04 |
| 1516  | LARC39     | 2690524 | 1.05 | 3.60E-04 |
| 23450 | SOHLH2     | 1240369 | 1.05 | 3.62E-04 |
| 34    | D030070L0  | 1510433 | 1.10 | 3.62E-04 |
| 90    | EG317677   | 2710465 | 0.94 | 3.63E-04 |
| 1399  | D4ERTD22E  | 4920564 | 1.07 | 3.64E-04 |
| 2109  | JMY        | 5820707 | 0.95 | 3.67E-04 |
| 8893  | MAGEA4     | 7550131 | 0.95 | 3.67E-04 |
| 1629  | SUMO2      | 6660497 | 0.92 | 3.69E-04 |
| 13534 | LOC10004   | 5870630 | 0.96 | 3.74E-04 |
| 10003 | CYCS       | 4390956 | 1.06 | 3.78E-04 |
| 10242 | DKS        | 2370767 | 1.09 | 3.78E-04 |
| 15743 | WDR4       | 3310242 | 1.05 | 3.80E-04 |
| 17832 | DSG1B      | 6510068 | 1.05 | 3.83E-04 |
| 16297 | GM93       | 4220707 | 1.05 | 3.84E-04 |
| 87    | HBB-B1     | 670403  | 1.09 | 3.85E-04 |
| 6374  | FADD       | 6450050 | 1.07 | 3.86E-04 |
| 10858 | FBN1       | 110048  | 1.06 | 3.88E-04 |
| 18098 | DGKQ       | 1710474 | 0.95 | 3.89E-04 |
| 21337 | HTR4       | 4850538 | 0.93 | 3.95E-04 |
| 3916  | RBM12      | 4290019 | 0.95 | 3.96E-04 |
| 15261 | TBPL2      | 6650484 | 0.95 | 3.97E-04 |
| 641   | RNF14      | 1430111 | 0.92 | 3.98E-04 |
| 5197  | 4933433P1  | 1300706 | 1.12 | 3.98E-04 |
| 19451 | SARS2      | 2060047 | 1.07 | 3.99E-04 |

|       |           |         |      |          |
|-------|-----------|---------|------|----------|
| 23709 | MDGA2     | 290280  | 0.95 | 3.99E-04 |
| 22113 | E130014I0 | 2450670 | 0.93 | 4.00E-04 |
| 17688 | LTB       | 160408  | 0.94 | 4.03E-04 |
| 3242  | PCTK2     | 1740634 | 0.97 | 4.04E-04 |
| 11139 | RCOR1     | 110154  | 1.06 | 4.07E-04 |
| 16340 | RFTN2     | 6590243 | 1.10 | 4.10E-04 |
| 9582  | RBBP9     | 2230424 | 1.09 | 4.11E-04 |
| 1696  | CAMK2D    | 1580397 | 0.96 | 4.12E-04 |
| 5053  | ARRB1     | 1340239 | 1.04 | 4.19E-04 |
| 17940 | PKD1L2    | 6400402 | 0.96 | 4.19E-04 |
| 687   | SRC       | 3120709 | 0.94 | 4.19E-04 |
| 20894 | OLFR1249  | 3060722 | 1.04 | 4.21E-04 |
| 13517 | CKAR      | 7210546 | 0.97 | 4.22E-04 |
| 5057  | TREML4    | 4670162 | 1.05 | 4.23E-04 |
| 7163  | BC050196  | 7320632 | 0.92 | 4.23E-04 |
| 4388  | HIF3A     | 4290201 | 1.04 | 4.24E-04 |
| 24934 | CCRL1     | 5890091 | 1.06 | 4.25E-04 |
| 22749 | PPROXD1   | 4180524 | 0.94 | 4.25E-04 |
| 8218  | UBE2M     | 2060450 | 1.08 | 4.26E-04 |
| 3665  | PRH1      | 6480170 | 0.95 | 4.28E-04 |
| 22576 | WDR67     | 6110324 | 0.95 | 4.28E-04 |
| 14661 | TRPCS5    | 6840653 | 0.94 | 4.29E-04 |
| 16580 | LOC100047 | 4290653 | 1.14 | 4.40E-04 |
| 7121  | PIGR      | 6510373 | 0.94 | 4.42E-04 |
| 3743  | V1RD19    | 1690367 | 0.97 | 4.43E-04 |
| 3118  | BARSD1    | 2760609 | 0.93 | 4.43E-04 |
| 5027  | SKIV2L    | 60707   | 1.06 | 4.44E-04 |
| 22418 | 2210412D0 | 5008    | 0.96 | 4.44E-04 |
| 18433 | ADAM23    | 3940286 | 1.13 | 4.49E-04 |
| 21298 | NPM1      | 6840433 | 0.90 | 4.53E-04 |
| 3756  | GTBPB8    | 5870180 | 0.94 | 4.53E-04 |
| 9508  | PRX       | 5050093 | 0.96 | 4.60E-04 |
| 10926 | FBXW8     | 7200626 | 1.07 | 4.60E-04 |
| 3748  | PPP1R3B   | 4150097 | 1.06 | 4.61E-04 |
| 27    | LCORL     | 2470343 | 0.92 | 4.62E-04 |
| 25525 | NCKIPSD   | 4670121 | 1.08 | 4.64E-04 |
| 37    | WDR31     | 5130082 | 0.94 | 4.64E-04 |
| 8223  | CCDC96    | 7040315 | 1.04 | 4.73E-04 |
| 15187 | PTRF      | 2320014 | 0.96 | 4.73E-04 |
| 12078 | DHRS7     | 3440639 | 1.07 | 4.79E-04 |
| 3809  | HSC3B2    | 7550575 | 0.97 | 4.79E-04 |
| 22712 | NFRF2     | 4890537 | 0.94 | 4.80E-04 |
| 23027 | CCDC97    | 6620528 | 1.06 | 4.82E-04 |
| 20468 | 3000004C0 | 6350367 | 0.94 | 4.83E-04 |
| 10933 | AKAP6     | 6510259 | 1.06 | 4.85E-04 |
| 6762  | RG9MTD2   | 1110072 | 1.06 | 4.89E-04 |
| 678   | ZFP113    | 830348  | 0.91 | 4.95E-04 |
| 15837 | SCRIB     | 840066  | 0.95 | 4.98E-04 |
| 22644 | E530011F1 | 4900170 | 0.95 | 5.04E-04 |
| 11253 | ARMC8     | 270524  | 1.04 | 5.13E-04 |
| 24639 | DUSP9     | 4920612 | 0.95 | 5.13E-04 |
| 13726 | ZFP105    | 670038  | 1.04 | 5.13E-04 |
| 10773 | HEATR5A   | 6520040 | 0.96 | 5.15E-04 |
| 3635  | LOC100049 | 130500  | 0.95 | 5.15E-04 |
| 14545 | HIRA      | 5290431 | 1.10 | 5.17E-04 |
| 24086 | PLEKHG4   | 520719  | 0.95 | 5.17E-04 |
| 3337  | GPC3      | 3890500 | 0.95 | 5.19E-04 |
| 17893 | PMM2      | 110474  | 0.96 | 5.21E-04 |
| 3291  | NDRG3     | 4070377 | 0.88 | 5.25E-04 |
| 17664 | TRAM2     | 4210193 | 0.97 | 5.28E-04 |
| 1719  | ZFP273    | 7400600 | 0.95 | 5.29E-04 |
| 3381  | PPAPDC3   | 5910446 | 1.09 | 5.35E-04 |
| 4116  | TGFB1     | 5130139 | 0.95 | 5.36E-04 |
| 1844  | COP22     | 4920056 | 1.06 | 5.45E-04 |
| 12526 | KRAS      | 1820088 | 1.05 | 5.45E-04 |
| 18204 | ZFP108    | 460543  | 1.05 | 5.48E-04 |
| 808   | PHF6      | 6100646 | 1.07 | 5.54E-04 |
| 115   | KLHL28    | 450594  | 0.96 | 5.58E-04 |
| 17705 | EDF1      | 1850477 | 1.19 | 5.60E-04 |
| 17955 | RPO1-4    | 6380370 | 1.06 | 5.60E-04 |
| 25141 | TMEM49    | 2340113 | 0.96 | 5.66E-04 |
| 10338 | NFASC     | 6060563 | 1.07 | 5.67E-04 |
| 24442 | HIPK4     | 2350546 | 1.05 | 5.67E-04 |
| 20263 | ZFP59     | 110072  | 0.95 | 5.71E-04 |
| 19526 | EXOSC2    | 1580307 | 0.89 | 5.81E-04 |
| 18705 | MCG10     | 4480373 | 1.10 | 5.83E-04 |
| 425   | GPR162    | 5260092 | 0.93 | 5.83E-04 |
| 1089  | ZFP771    | 4210278 | 0.94 | 5.84E-04 |
| 25611 | CHMP2A    | 540156  | 1.06 | 5.89E-04 |
| 8225  | BC053749  | 3290379 | 1.07 | 5.92E-04 |
| 23289 | TMEM115   | 5900379 | 0.91 | 5.97E-04 |
| 1934  | KIF15     | 7650538 | 1.04 | 5.99E-04 |
| 6649  | PPP1R2    | 2850192 | 0.92 | 6.08E-04 |
| 9045  | H5BP1     | 7510288 | 0.89 | 6.12E-04 |
| 5708  | BC087945  | 5720128 | 0.95 | 6.13E-04 |
| 24345 | TCR1AIP2  | 4760255 | 0.97 | 6.14E-04 |
| 6223  | RANBP1    | 1540348 | 0.91 | 6.16E-04 |
| 24056 | KRT14     | 1470619 | 0.97 | 6.17E-04 |
| 5585  | V1RC13    | 4570017 | 0.94 | 6.17E-04 |

|       |           |         |      |          |
|-------|-----------|---------|------|----------|
| 14073 | MUC1      | 1260047 | 0.94 | 3.99E-04 |
| 3087  | ETFA      | 5960653 | 0.92 | 4.00E-04 |
| 1323  | AAMP      | 4050470 | 0.86 | 4.00E-04 |
| 10936 | 4933407P1 | 3440722 | 0.96 | 4.00E-04 |
| 138   | CYP4F16   | 540075  | 0.94 | 4.05E-04 |
| 25646 | 4930401F2 | 4900717 | 1.04 | 4.05E-04 |
| 5696  | CARS5     | 7200528 | 1.06 | 4.06E-04 |
| 6029  | SIC7A13   | 7050474 | 0.95 | 4.07E-04 |
| 2631  | TAF9      | 3850458 | 1.08 | 4.09E-04 |
| 15100 | CHRNA4    | 2070482 | 0.94 | 4.11E-04 |
| 5965  | PTPRK     | 1740561 | 0.95 | 4.12E-04 |
| 11006 | SUCLA2    | 4480477 | 0.94 | 4.14E-04 |
| 158   | RAB17     | 2850349 | 0.96 | 4.14E-04 |
| 1288  | BTG3      | 7150433 | 1.05 | 4.17E-04 |
| 21540 | OLFR736   | 6250156 | 0.95 | 4.19E-04 |
| 1592  | HNRNPR    | 6650204 | 1.05 | 4.19E-04 |
| 18033 | CLEC11A   | 2690411 | 1.08 | 4.20E-04 |
| 22359 | SNOX      | 5050908 | 1.11 | 4.20E-04 |
| 1628  | ACSM5     | 4850739 | 0.95 | 4.21E-04 |
| 9426  | 8030462N1 | 6220086 | 1.04 | 4.28E-04 |
| 753   | ARHGAP27  | 5130438 | 1.07 | 4.31E-04 |
| 6124  | FBXO34    | 6380148 | 1.12 | 4.33E-04 |
| 21075 | GSDMA1    | 3800187 | 1.05 | 4.42E-04 |
| 16167 | BCO24561  | 6620176 | 1.05 | 4.42E-04 |
| 11276 | POLR2A    | 450609  | 0.93 | 4.43E-04 |
| 13039 | ERRF1     | 4570368 | 0.91 | 4.44E-04 |
| 11594 | TNFAIP1   | 3940520 | 0.89 | 4.46E-04 |
| 18502 | 57304101S | 10270   | 1.06 | 4.51E-04 |
| 19294 | CPA6      | 5810026 | 1.04 | 4.51E-04 |
| 16802 | ATRX      | 4500400 | 1.04 | 4.54E-04 |
| 11518 | RHOX5     | 4390148 | 0.96 | 4.54E-04 |
| 23076 | 3110004L2 | 1260468 | 1.05 | 4.56E-04 |
| 16521 | STX6      | 3840202 | 0.91 | 4.57E-04 |
| 12515 | V1RH12    | 4260482 | 0.94 | 4.64E-04 |
| 1532  | 2810003C1 | 3610239 | 1.10 | 4.64E-04 |
| 19769 | 1110039B1 | 3710286 | 0.94 | 4.67E-04 |
| 15503 | OLFR366   | 1660019 | 1.04 | 4.69E-04 |
| 12934 | BCAR1     | 1770189 | 1.06 | 4.69E-04 |
| 6623  | 4921528G0 | 7050390 | 0.95 | 4.70E-04 |
| 21131 | ZFP423    | 2600402 | 1.07 | 4.70E-04 |
| 3633  | SPRE3     | 7050200 | 0.95 | 4.72E-04 |
| 20190 | D11EWG05  | 5070669 | 0.90 | 4.78E-04 |
| 10763 | TYMS      | 510544  | 1.04 | 4.79E-04 |
| 18721 | NKIRAS1   | 1070195 | 1.04 | 4.82E-04 |
| 9664  | GPRS6     | 60079   | 0.94 | 4.86E-04 |
| 18952 | RAB8A     | 1240324 | 1.08 | 4.88E-04 |
| 16848 | OGT       | 6960095 | 0.93 | 4.91E-04 |
| 1384  | DMD       | 360367  | 0.92 | 4.94E-04 |
| 7974  | MTNR1B    | 7320100 | 1.05 | 4.99E-04 |
| 14644 | TMEM180   | 1690685 | 0.92 | 5.01E-04 |
| 24855 | 1600029D2 | 1300092 | 1.05 | 5.01E-04 |
| 20493 | KUHL6     | 1780445 | 1.06 | 5.03E-04 |
| 441   | NUP37     | 4290594 | 0.94 | 5.05E-04 |
| 10109 | YIPF6     | 6290575 | 1.06 | 5.18E-04 |
| 7150  | V1RC3     | 4810020 | 0.96 | 5.22E-04 |
| 19481 | ATP8B3    | 130020  | 0.95 | 5.22E-04 |
| 10107 | SOC51     | 5670497 | 1.08 | 5.25E-04 |
| 5330  | OLFR1380  | 940468  | 0.95 | 5.25E-04 |
| 2803  | ZFP523    | 6510427 | 1.09 | 5.25E-04 |
| 10893 | HTR5A     | 2060400 | 0.94 | 5.27E-04 |
| 15915 | MX1       | 1050553 | 0.92 | 5.27E-04 |
| 1483  | RIPPLY1   | 3290692 | 1.04 | 5.28E-04 |
| 1533  | PMMP22    | 4730685 | 1.09 | 5.28E-04 |
| 23970 | DDX19B    | 3610482 | 0.90 | 5.29E-04 |
| 3418  | MECR      | 1990730 | 1.08 | 5.36E-04 |
| 15850 | LOC268782 | 1570661 | 1.06 | 5.37E-04 |
| 23313 | E330016A1 | 2350221 | 0.96 | 5.47E-04 |
| 10103 | GIT2      | 3450372 | 1.07 | 5.49E-04 |
| 13223 | ANP32B    | 6550707 | 0.96 | 5.51E-04 |
| 19747 | NNT       | 3840102 | 1.07 | 5.52E-04 |
| 22269 | V1RD3     | 2630050 | 0.95 | 5.58E-04 |
| 13018 | BCO04728  | 2690368 | 1.08 | 5.60E-04 |
| 5875  | OLFR944   | 1990300 | 1.06 | 5.61E-04 |
| 11451 | DRF9      | 4810259 | 1.06 | 5.62E-04 |
| 21010 | MKCBPAP   | 4640292 | 1.03 | 5.63E-04 |
| 7908  | RNF5      | 2450224 | 1.10 | 5.65E-04 |
| 24651 | REEP5     | 730541  | 0.86 | 5.64E-04 |
| 19090 | 1110049F1 | 780332  | 0.93 | 5.70E-04 |
| 2034  | GORASP2   | 5910601 | 0.94 | 5.71E-04 |
| 22009 | FKBP2     | 1050082 | 1.10 | 5.73E-04 |
| 17511 | ELMO2     | 5050465 | 1.08 | 5.73E-04 |
| 11811 | MEN1      | 4120593 | 0.91 | 5.74E-04 |
| 22983 | 6430510M  | 2600068 | 0.87 | 5.74E-04 |
| 19491 | CENPQ     | 6480292 | 1.04 | 5.75E-04 |
| 6815  | ZC3H12B   | 2710368 | 1.06 | 5.78E-04 |
| 7841  | MEK3A     | 6290367 | 1.04 | 5.80E-04 |
| 284   | OLFR1497  | 4290626 | 1.05 | 5.82E-04 |
| 1787  | MUG4      | 5870010 | 0.97 | 5.82E-04 |
| 909   | OLFR144   | 5080440 | 0.97 | 5.83E-04 |

|       |           |         |      |          |
|-------|-----------|---------|------|----------|
| 1706  | 2610507B1 | 4200674 | 1.07 | 6.18E-04 |
| 10842 | TAZ       | 5130154 | 0.94 | 6.20E-04 |
| 128   | TRPC4     | 3060398 | 0.96 | 6.21E-04 |
| 1206  | BC017612  | 7380048 | 0.96 | 6.23E-04 |
| 22163 | EIF5      | 5490114 | 0.91 | 6.24E-04 |
| 10356 | 4930404H2 | 2900162 | 1.05 | 6.25E-04 |
| 15568 | 1110034A2 | 19701   | 1.05 | 6.28E-04 |
| 784   | ATIC      | 4830484 | 1.05 | 6.28E-04 |
| 16361 | OLFR1013  | 4060358 | 0.96 | 6.33E-04 |
| 997   | 4921530G0 | 5900465 | 0.93 | 6.36E-04 |
| 25166 | RPS4Y2    | 6590008 | 0.92 | 6.40E-04 |
| 21247 | ACAD9     | 3170301 | 1.11 | 6.41E-04 |
| 21211 | COL4A3BP  | 1260440 | 0.96 | 6.47E-04 |
| 70    | FGFR3     | 7200035 | 1.12 | 6.49E-04 |
| 10970 | TUBA3A    | 4180743 | 0.96 | 6.51E-04 |
| 19021 | F730047E0 | 4670601 | 1.05 | 6.53E-04 |
| 5622  | CCL25     | 1780307 | 1.07 | 6.57E-04 |
| 636   | KBTBD8    | 350672  | 1.06 | 6.75E-04 |
| 10774 | MAFB      | 6060409 | 1.05 | 6.78E-04 |
| 1759  | STX3      | 5820601 | 1.05 | 6.84E-04 |
| 14268 | WNK4      | 1850255 | 0.94 | 6.86E-04 |
| 8141  | PPM1D     | 2320537 | 1.09 | 6.88E-04 |
| 9933  | NUT       | 3180091 | 1.05 | 6.89E-04 |
| 11855 | RBM52     | 1500647 | 1.05 | 6.89E-04 |
| 13198 | KCNQ3     | 4570546 | 1.04 | 6.89E-04 |
| 12162 | SALL1     | 430050  | 0.95 | 6.91E-04 |
| 17874 | ATP5J     | 4860673 | 0.96 | 6.95E-04 |
| 536   | PDE6D     | 1010730 | 0.96 | 6.96E-04 |
| 15492 | SPEN      | 3460605 | 0.94 | 6.97E-04 |
| 667   | LOC637082 | 60626   | 1.04 | 6.98E-04 |
| 18398 | MBD1      | 1110338 | 0.92 | 6.99E-04 |
| 17098 | SMARCA2   | 1580327 | 1.09 | 6.99E-04 |
| 5306  | OLFR608   | 6940204 | 1.07 | 7.00E-04 |
| 12824 | RWDD2B    | 770372  | 0.94 | 7.00E-04 |
| 10858 | FBN1      | 110048  | 1.06 | 7.04E-04 |
| 10995 | CCDC130   | 160148  | 0.94 | 7.04E-04 |
| 232   | OLFR482   | 3800292 | 0.94 | 7.07E-04 |
| 15070 | B4GALT3   | 360102  | 0.93 | 7.11E-04 |
| 2280  | SRPX2     | 2190139 | 0.97 | 7.12E-04 |
| 18109 | AI662250  | 1070356 | 0.94 | 7.21E-04 |
| 18136 | MTH1      | 2850022 | 0.95 | 7.21E-04 |
| 5157  | TIGD3     | 2060238 | 1.05 | 7.26E-04 |
| 1511  | PDCL      | 20722   | 1.09 | 7.30E-04 |
| 4406  | TBC1D2    | 5550482 | 1.05 | 7.33E-04 |
| 13552 | TMEM140   | 2690379 | 0.96 | 7.34E-04 |
| 2315  | CAPN2     | 4390020 | 1.07 | 7.35E-04 |
| 22609 | TDPO23    | 5490544 | 0.95 | 7.36E-04 |
| 20007 | FBXO8     | 5890730 | 0.95 | 7.36E-04 |
| 8769  | FOXP2     | 2940070 | 0.95 | 7.46E-04 |
| 4943  | EG630579  | 4640204 | 0.96 | 7.48E-04 |
| 25427 | 1700007G1 | 3310274 | 1.05 | 7.55E-04 |
| 12070 | MAN1C1    | 5700747 | 1.05 | 7.55E-04 |
| 300   | SART3     | 3800979 | 0.96 | 7.56E-04 |
| 7970  | D17H6553E | 3520255 | 1.05 | 7.56E-04 |
| 16855 | TLR11     | 2490072 | 0.95 | 7.57E-04 |
| 16395 | JUN       | 7560291 | 1.11 | 7.57E-04 |
| 8309  | LMCD1     | 2710347 | 1.10 | 7.59E-04 |
| 13716 | DHRS4     | 2510689 | 0.94 | 7.61E-04 |
| 21442 | OLFR1431  | 5050048 | 0.96 | 7.62E-04 |
| 17368 | SERINC3   | 1770201 | 0.89 | 7.65E-04 |
| 15348 | CRAT      | 5890102 | 0.95 | 7.67E-04 |
| 13086 | AA408296  | 4920746 | 1.07 | 7.75E-04 |
| 3202  | NIPSNAP3A | 630162  | 0.96 | 7.75E-04 |
| 6610  | C10C2     | 870391  | 0.94 | 7.80E-04 |
| 15949 | TRIP4     | 3850603 | 1.06 | 7.83E-04 |
| 3264  | OLFR559   | 1050397 | 1.03 | 7.84E-04 |
| 10629 | CSPG4     | 5690553 | 1.06 | 7.85E-04 |
| 4777  | CTNNA1    | 2320168 | 1.07 | 7.88E-04 |
| 19971 | RSF1      | 6220332 | 0.95 | 7.91E-04 |
| 4851  | DDX3Y     | 6520685 | 0.96 | 7.91E-04 |
| 20869 | DST       | 5360021 | 0.95 | 7.95E-04 |
| 3359  | ZP2       | 1450129 | 1.05 | 7.95E-04 |
| 14293 | BNIP1     | 50681   | 1.07 | 8.00E-04 |
| 5522  | DMRT2     | 6770161 | 0.94 | 8.03E-04 |
| 21156 | RAW       | 1050097 | 1.09 | 8.05E-04 |
| 25445 | OLFR50    | 5220433 | 1.05 | 8.06E-04 |
| 12664 | LCTL      | 4290358 | 0.97 | 8.07E-04 |
| 10530 | RPS27A    | 5550431 | 1.05 | 8.10E-04 |
| 214   | NDUFA5    | 6560152 | 1.07 | 8.11E-04 |
| 6500  | RSRC1     | 1010487 | 0.93 | 8.12E-04 |
| 1566  | AU018829  | 4890059 | 1.06 | 8.20E-04 |
| 6726  | USPL1     | 3520274 | 0.94 | 8.29E-04 |
| 16610 | PPP2R5C   | 2760707 | 0.93 | 8.29E-04 |
| 17003 | ACTG2     | 1980209 | 0.96 | 8.30E-04 |
| 7848  | OLFR1008  | 7200647 | 0.95 | 8.32E-04 |
| 9193  | ABO41803  | 3570189 | 1.04 | 8.37E-04 |
| 18647 | COL117A1  | 6770369 | 0.95 | 8.40E-04 |
| 7726  | TIAL1     | 6650148 | 1.03 | 8.42E-04 |
| 24028 | WDR34     | 2690224 | 0.93 | 8.45E-04 |



|       |           |         |      |          |
|-------|-----------|---------|------|----------|
| 23696 | PECAM1    | 5670020 | 1.07 | 5.85E-04 |
| 2919  | MR1       | 4260292 | 1.07 | 5.86E-04 |
| 33    | OPN5      | 3180209 | 0.92 | 5.86E-04 |
| 21172 | TMOD2     | 2030025 | 0.96 | 5.89E-04 |
| 12817 | 1700109HC | 2760239 | 1.05 | 5.90E-04 |
| 3679  | BC021381  | 1240575 | 1.05 | 5.94E-04 |
| 19803 | MYOC      | 7400463 | 0.89 | 6.01E-04 |
| 12812 | APCS      | 2320170 | 1.06 | 6.06E-04 |
| 7673  | OAS1A     | 3290767 | 1.05 | 6.09E-04 |
| 6945  | LOC216443 | 5420367 | 1.07 | 6.12E-04 |
| 10574 | MS4AGD    | 3180025 | 1.06 | 6.15E-04 |
| 19041 | KCNMB4    | 4180491 | 1.11 | 6.17E-04 |
| 4171  | CSN2      | 450376  | 0.95 | 6.17E-04 |
| 23186 | GOSR1     | 3850138 | 1.06 | 6.17E-04 |
| 14930 | GNA15     | 3310577 | 0.95 | 6.18E-04 |
| 21748 | OLFR681   | 6220278 | 1.03 | 6.36E-04 |
| 6042  | B3GALT2   | 3780246 | 1.05 | 6.37E-04 |
| 20412 | BGN       | 2100402 | 0.88 | 6.38E-04 |
| 10737 | 40972     | 3420026 | 0.93 | 6.44E-04 |
| 429   | MICAL1    | 1850326 | 0.90 | 6.44E-04 |
| 24167 | HCRTR2    | 3520743 | 1.06 | 6.48E-04 |
| 1536  | CANT1     | 5900594 | 0.94 | 6.52E-04 |
| 372   | CYP11B2   | 4760246 | 1.06 | 6.61E-04 |
| 14342 | ZFP52     | 4900575 | 0.96 | 6.62E-04 |
| 10041 | RLBP1L1   | 1070450 | 1.05 | 6.62E-04 |
| 22716 | KCNK6     | 6510026 | 1.04 | 6.69E-04 |
| 24627 | CRAT      | 160121  | 1.10 | 6.73E-04 |
| 588   | E1F4G2    | 6520484 | 1.15 | 6.75E-04 |
| 8461  | 1100001E0 | 6200685 | 1.04 | 6.75E-04 |
| 24180 | COR07     | 6840092 | 1.04 | 6.81E-04 |
| 5692  | LANCL1    | 1580762 | 1.12 | 6.82E-04 |
| 23343 | BC003993  | 4290537 | 0.96 | 6.83E-04 |
| 8393  | DEFB19    | 2030088 | 1.05 | 6.83E-04 |
| 3402  | GJC2      | 610112  | 1.07 | 6.85E-04 |
| 24457 | CCND2     | 1580088 | 0.86 | 6.88E-04 |
| 25162 | ORM1      | 60196   | 1.05 | 6.92E-04 |
| 598   | MYLC2B    | 6100021 | 0.92 | 6.93E-04 |
| 70    | FGFR3     | 7200035 | 1.11 | 6.96E-04 |
| 15381 | LRRC1     | 5810647 | 0.96 | 6.98E-04 |
| 11434 | CDC26     | 5560687 | 1.05 | 7.04E-04 |
| 24803 | SP2       | 5220368 | 0.95 | 7.06E-04 |
| 22951 | PGK2      | 4920021 | 1.06 | 7.31E-04 |
| 10106 | MAN1B1    | 6100110 | 0.94 | 7.23E-04 |
| 22696 | TEX9      | 730546  | 0.94 | 7.28E-04 |
| 22484 | MUC13     | 4880386 | 1.07 | 7.30E-04 |
| 10660 | MAPK12    | 2690392 | 0.96 | 7.31E-04 |
| 217   | WIPI2     | 2190612 | 0.91 | 7.41E-04 |
| 16377 | AKAP1     | 5290670 | 0.96 | 7.44E-04 |
| 16804 | CTDSP2    | 6520468 | 0.97 | 7.46E-04 |
| 9994  | PTP4A2    | 6180309 | 1.09 | 7.56E-04 |
| 24894 | RASGEF1B  | 3370575 | 0.96 | 7.57E-04 |
| 21256 | H19A      | 7610661 | 0.94 | 7.62E-04 |
| 4473  | HSPB1     | 5670722 | 0.95 | 7.64E-04 |
| 20162 | 9130005N1 | 450397  | 1.05 | 7.73E-04 |
| 11    | OLFR187   | 380370  | 0.92 | 7.79E-04 |
| 6325  | EN2       | 6940544 | 0.93 | 7.80E-04 |
| 2114  | INOC1     | 4880121 | 0.97 | 7.83E-04 |
| 4542  | 2410004A2 | 3870717 | 1.05 | 7.83E-04 |
| 1748  | NAT2      | 1710451 | 1.06 | 7.83E-04 |
| 12474 | PTK9      | 3990682 | 0.91 | 7.86E-04 |
| 25214 | DEPDC7    | 1660358 | 1.06 | 7.95E-04 |
| 12547 | 2310067B1 | 5820142 | 0.93 | 8.00E-04 |
| 8235  | SHCBP1    | 3830397 | 1.04 | 8.00E-04 |
| 224   | 49333442  | 6100497 | 1.07 | 8.02E-04 |
| 15708 | SCYL1BP1  | 4010564 | 1.03 | 8.02E-04 |
| 12851 | LRRC23    | 670386  | 0.94 | 8.11E-04 |
| 4116  | TGFB1     | 5130139 | 0.93 | 8.17E-04 |
| 13251 | MBP       | 1450646 | 1.14 | 8.18E-04 |
| 15574 | HMX1      | 4220300 | 1.06 | 8.19E-04 |
| 3868  | NOXO1     | 2370672 | 1.07 | 8.21E-04 |
| 5472  | DOHXS9928 | 5090537 | 1.05 | 8.21E-04 |
| 17883 | 4931432M1 | 270152  | 0.97 | 8.23E-04 |
| 15011 | AFF4      | 7100603 | 0.94 | 8.29E-04 |
| 5136  | DNAHCS    | 4860270 | 0.96 | 8.33E-04 |
| 24851 | MARK4     | 4480445 | 1.05 | 8.34E-04 |
| 11593 | SIAH1B    | 3190376 | 0.93 | 8.35E-04 |
| 4888  | BC026585  | 2900661 | 1.09 | 8.36E-04 |
| 8321  | BC004044  | 3290253 | 0.90 | 8.37E-04 |
| 19539 | DDX3Y     | 4120196 | 0.95 | 8.38E-04 |
| 1276  | NFATC2    | 2000725 | 1.05 | 8.41E-04 |
| 14141 | CSNK1G1   | 2710437 | 1.05 | 8.42E-04 |
| 25479 | NR2F6     | 50431   | 1.05 | 8.43E-04 |
| 10750 | EG624219  | 3520095 | 0.93 | 8.48E-04 |
| 22587 | PIK3IP1   | 940180  | 0.94 | 8.55E-04 |
| 22728 | RG53      | 1230292 | 0.95 | 8.56E-04 |
| 1578  | LOC100044 | 5050402 | 1.05 | 8.56E-04 |
| 2378  | ANKLE2    | 5360598 | 1.05 | 8.56E-04 |
| 606   | MEX3C     | 1010446 | 1.04 | 8.68E-04 |
| 1372  | 483142615 | 1430132 | 1.04 | 8.68E-04 |

|       |            |         |      |          |
|-------|------------|---------|------|----------|
| 10576 | CCDC51     | 5360255 | 1.07 | 8.46E-04 |
| 2359  | PROM1      | 2760167 | 1.07 | 8.50E-04 |
| 1441  | 1200016D2  | 20719   | 1.06 | 8.59E-04 |
| 4443  | IFIT1      | 1780142 | 1.05 | 8.63E-04 |
| 8659  | BUD13      | 5080041 | 1.06 | 8.63E-04 |
| 2627  | RRM34      | 4250470 | 0.95 | 8.66E-04 |
| 6791  | EFNA1      | 2490053 | 1.04 | 8.68E-04 |
| 4298  | RPRML      | 2680523 | 0.93 | 8.74E-04 |
| 18412 | ADPGK      | 5900601 | 0.92 | 8.75E-04 |
| 215   | 1810015A1  | 510338  | 0.92 | 8.75E-04 |
| 9971  | H2-DMA     | 870154  | 1.07 | 8.76E-04 |
| 6581  | PARK7      | 4730739 | 1.08 | 8.77E-04 |
| 2707  | ACOX2      | 3290411 | 0.94 | 8.78E-04 |
| 1034  | OLFR1094   | 5570270 | 0.94 | 8.81E-04 |
| 10661 | HFE        | 2360672 | 1.07 | 8.89E-04 |
| 5003  | GLT8D2     | 4860446 | 1.07 | 8.99E-04 |
| 42    | RBM47      | 6270243 | 1.06 | 9.00E-04 |
| 4485  | ZBTB7C     | 2260398 | 1.06 | 9.04E-04 |
| 14314 | GNM51      | 3440504 | 1.17 | 9.13E-04 |
| 4670  | RRM1       | 6400348 | 1.06 | 9.19E-04 |
| 22198 | MICAL3     | 4200592 | 1.06 | 9.19E-04 |
| 6967  | NAB1       | 780736  | 0.94 | 9.24E-04 |
| 8114  | SMAD3      | 2450053 | 1.08 | 9.24E-04 |
| 16905 | TGFB3      | 2510500 | 0.96 | 9.25E-04 |
| 3080  | CYP2C40    | 3850273 | 1.03 | 9.32E-04 |
| 10263 | 4930519G0  | 4900091 | 0.96 | 9.38E-04 |
| 11286 | TCAM1      | 4640072 | 0.96 | 9.41E-04 |
| 22336 | 483342609  | 4040400 | 1.04 | 9.41E-04 |
| 16075 | ROR2       | 6130743 | 0.96 | 9.43E-04 |
| 19123 | LCE3F      | 1660754 | 0.97 | 9.43E-04 |
| 21221 | SLC25A27   | 6420017 | 0.94 | 9.44E-04 |
| 624   | OLFR1218   | 3440189 | 0.94 | 9.54E-04 |
| 24291 | ABRA       | 7550066 | 0.96 | 9.55E-04 |
| 16271 | 6330503K2  | 3420521 | 1.08 | 9.83E-04 |
| 17432 | ITGB5      | 1770152 | 1.10 | 9.87E-04 |
| 18516 | WBSCR27    | 3930026 | 0.95 | 9.90E-04 |
| 17232 | FADS6      | 7150475 | 0.95 | 9.90E-04 |
| 21867 | SNAPC5     | 3290368 | 1.10 | 9.95E-04 |
| 1501  | LOC100047  | 7510609 | 0.95 | 9.96E-04 |
| 15929 | HDLBP      | 6180187 | 0.93 | 0.001    |
| 16950 | SCNNA1     | 2140048 | 1.04 | 0.001    |
| 21977 | KIRREL2    | 1300022 | 0.92 | 0.001    |
| 5687  | TRIB3      | 2370110 | 0.90 | 0.001    |
| 7885  | V1RE12     | 4540687 | 0.94 | 0.001    |
| 19907 | E1F1AY     | 2450402 | 0.96 | 0.001    |
| 19901 | DPP3       | 4050372 | 1.12 | 0.001    |
| 24844 | TRIM21     | 5670398 | 0.95 | 0.001    |
| 3854  | ABPE       | 270520  | 1.04 | 0.001    |
| 5517  | SS18       | 6100010 | 1.05 | 0.001    |
| 13091 | MBNL2      | 3450719 | 1.12 | 0.001    |
| 19286 | GUCY2C     | 4070719 | 0.95 | 0.001    |
| 25240 | TNIP3      | 10181   | 0.96 | 0.001    |
| 21787 | PGPEP1     | 2490521 | 0.96 | 0.001    |
| 14903 | ZBTB40     | 1980598 | 1.05 | 0.001    |
| 1781  | NDUFB6     | 6480747 | 1.09 | 0.001    |
| 24017 | HTRA3      | 780546  | 0.94 | 0.001    |
| 16352 | WDR8       | 6290253 | 0.94 | 0.001    |
| 24820 | ACTL6B     | 940386  | 0.92 | 0.001    |
| 503   | INPPE5     | 3800753 | 1.05 | 0.001    |
| 3632  | NOTCH1     | 6450022 | 0.97 | 0.001    |
| 4804  | TNKS1BP1   | 6420114 | 1.06 | 0.001    |
| 9240  | DCBLD1     | 1500768 | 0.94 | 0.001    |
| 14349 | SERPINB7   | 580475  | 0.95 | 0.001    |
| 6600  | DCTN1      | 2900154 | 1.04 | 0.001    |
| 11696 | PAQR3      | 4210040 | 0.96 | 0.001    |
| 136   | KRT222     | 150064  | 1.12 | 0.001    |
| 10638 | NEUROG2    | 6200647 | 0.94 | 0.001    |
| 25245 | SLC12A9    | 6480575 | 1.07 | 0.001    |
| 6209  | ORMDL1     | 6400202 | 0.96 | 0.001    |
| 2099  | KIRREL3    | 6280474 | 1.07 | 0.001    |
| 18174 | 5830405N2  | 2900307 | 0.95 | 0.001    |
| 20177 | TCL1       | 2680438 | 1.04 | 0.001    |
| 4140  | GPC4       | 5270491 | 1.07 | 0.001    |
| 22587 | PIK3IP1    | 940180  | 1.07 | 0.001    |
| 5537  | C11orf112A | 6620707 | 1.04 | 0.001    |
| 3119  | FGD6       | 940487  | 0.93 | 0.001    |
| 6571  | ATG2B      | 2070138 | 0.97 | 0.001    |
| 3822  | TCFAP2C    | 3780711 | 0.95 | 0.001    |
| 13171 | KRT27      | 6200671 | 1.04 | 0.001    |
| 3744  | ZFP385A    | 6960523 | 1.07 | 0.001    |
| 17619 | CDH23      | 5960731 | 0.95 | 0.001    |
| 2946  | CASP3      | 2690307 | 1.04 | 0.001    |
| 17712 | OLFR1101   | 620458  | 0.95 | 0.001    |
| 18761 | 50314080C  | 6370504 | 1.07 | 0.001    |
| 15442 | CD300LF    | 3170487 | 0.95 | 0.001    |
| 8393  | DEFB19     | 2030088 | 1.05 | 0.001    |
| 10480 | 2310008HG  | 1770397 | 0.96 | 0.001    |
| 8044  | UCP2       | 4920594 | 1.05 | 0.001    |
| 1842  | RUNDC1     | 6250681 | 1.07 | 0.001    |

|       |           |         |      |          |
|-------|-----------|---------|------|----------|
| 17676 | 1110008J0 | 2600605 | 1.06 | 8.68E-04 |
| 10908 | TMEM47    | 6400634 | 0.90 | 8.70E-04 |
| 8997  | KCNE3     | 4860184 | 1.03 | 8.76E-04 |
| 19725 | ZFP449    | 6020300 | 0.95 | 8.83E-04 |
| 9547  | CADM3     | 580673  | 0.89 | 8.84E-04 |
| 18470 | ABCF1     | 2340246 | 1.05 | 8.89E-04 |
| 144   | EVA3      | 5220181 | 1.05 | 8.92E-04 |
| 1103  | RG51      | 4830072 | 0.93 | 8.95E-04 |
| 16395 | JUN       | 7560291 | 1.09 | 8.96E-04 |
| 9916  | H2-D4     | 5050451 | 1.05 | 8.96E-04 |
| 24174 | DUS3L     | 6370543 | 1.07 | 8.98E-04 |
| 1463  | ABI3BP    | 2810576 | 1.06 | 8.99E-04 |
| 13599 | APOC1     | 1710066 | 0.95 | 8.99E-04 |
| 16651 | HIST1H4H  | 7400377 | 1.10 | 9.00E-04 |
| 5153  | ZDHC13    | 5560079 | 1.06 | 9.01E-04 |
| 4207  | OLFR186   | 2120528 | 0.92 | 9.05E-04 |
| 12936 | NDUFAB8   | 4220519 | 1.10 | 9.16E-04 |
| 9264  | LOC100044 | 6580711 | 1.10 | 9.19E-04 |
| 502   | STX10     | 7610468 | 1.05 | 9.29E-04 |
| 23391 | NPR2      | 1580129 | 1.06 | 9.30E-04 |
| 1614  | STGALNAC  | 5670592 | 0.95 | 9.39E-04 |
| 5651  | NLN       | 5670112 | 0.92 | 9.46E-04 |
| 13685 | NUAK1     | 6860309 | 0.85 | 9.47E-04 |
| 7769  | OLFR1356  | 5960307 | 1.04 | 9.49E-04 |
| 22645 | RNF185    | 6900543 | 0.95 | 9.56E-04 |
| 13413 | 2610024G1 | 10019   | 1.10 | 9.59E-04 |
| 1573  | OLFR23    | 2810201 | 1.08 | 9.63E-04 |
| 9370  | TMM9      | 610075  | 1.07 | 9.63E-04 |
| 13798 | ARE       | 6660367 | 0.96 | 9.63E-04 |
| 1606  | HMG1      | 1260274 | 0.88 | 9.63E-04 |
| 9817  | 4932417HC | 5890327 | 0.93 | 9.66E-04 |
| 15870 | GSS       | 1340020 | 1.06 | 9.74E-04 |
| 4569  | PLEKHG5   | 6020327 | 0.92 | 9.74E-04 |
| 19630 | CNNM1     | 5050246 | 1.05 | 9.78E-04 |
| 14684 | BC066107  | 2810390 | 1.05 | 9.85E-04 |
| 10573 | 130000110 | 1050114 | 0.93 | 9.85E-04 |
| 20463 | EV1       | 4730427 | 0.95 | 9.87E-04 |
| 5944  | V1RE2     | 2470519 | 0.94 | 9.93E-04 |
| 7800  | ADAM17    | 5900653 | 0.94 | 9.96E-04 |
| 4158  | BC013491  | 1940246 | 0.96 | 0.001    |
| 11440 | PNRC2     | 2850441 | 0.92 | 0.001    |
| 1162  | ATP6V1H   | 5220139 | 1.09 | 0.001    |
| 11721 | PRR14     | 5810280 | 0.93 | 0.001    |
| 4240  | RAET1A    | 5870543 | 0.96 | 0.001    |
| 25116 | FBXL12    | 4150440 | 1.10 | 0.001    |
| 5480  | AKP2      | 7200717 | 1.06 | 0.001    |
| 12381 | JMJD3     | 4920424 | 1.06 | 0.001    |
| 12231 | OLFR117   | 6270523 | 0.95 | 0.001    |
| 20179 | CDC20     | 4570088 | 1.05 | 0.001    |
| 1522  | GRSF1     | 4890598 | 0.88 | 0.001    |
| 24869 | TRPM6     | 5700364 | 0.95 | 0.001    |
| 15714 | RALGAP5   | 3170482 | 0.96 | 0.001    |
| 7787  | RCSO1     | 6400255 | 1.05 | 0.001    |
| 2565  | NRCAM     | 4830040 | 1.06 | 0.001    |
| 14892 | O910001L0 | 6550632 | 1.10 | 0.001    |
| 20074 | MYST1     | 6370674 | 1.07 | 0.001    |
| 5547  | PDE1A     | 7210632 | 0.90 | 0.001    |
| 6661  | GRIK1     | 2260189 | 0.97 | 0.001    |
| 10919 | SDCBP     | 1770328 | 1.06 | 0.001    |
| 1907  | 9430028L0 | 6560010 | 0.92 | 0.001    |
| 3512  | DSG2      | 1740082 | 1.05 | 0.001    |
| 9249  | BGLAP-RS1 | 3450521 | 1.04 | 0.001    |
| 4602  | XLR4C     | 1850382 | 0.96 | 0.001    |
| 11090 | TRCN1     | 2850154 | 1.04 | 0.001    |
| 22280 | ZHX3      | 2100253 | 0.96 | 0.001    |
| 18733 | CDK8      | 4890228 | 0.97 | 0.001    |
| 1960  | A430107D2 | 670050  | 1.09 | 0.001    |
| 1751  | CACNA1C   | 6960630 | 0.96 | 0.001    |
| 9035  | TLR13     | 7320020 | 0.91 | 0.001    |
| 4276  | DHX30     | 1260692 | 0.91 | 0.001    |
| 21631 | SERPINB9D | 7610184 | 1.05 | 0.001    |
| 11214 | PODN      | 3290301 | 0.95 | 0.001    |
| 22350 | NMKNAT2   | 6760091 | 0.95 | 0.001    |
| 21737 | GALNT10   | 6400463 | 1.05 | 0.001    |
| 13532 | RNASE9    | 2940692 | 0.97 | 0.001    |
| 737   | SERPINB12 | 7650335 | 1.11 | 0.001    |
| 4300  | PRNPIP1   | 6650215 | 0.90 | 0.001    |
| 860   | ELMO1     | 1570239 | 1.05 | 0.001    |
| 7572  | HERC3     | 2480243 | 1.05 | 0.001    |
| 6049  | PRNPIP1   | 6860390 | 1.11 | 0.001    |
| 21842 | PRPF38B   | 5090747 | 1.06 | 0.001    |
| 8639  | ATP2B2    | 3170148 | 0.93 | 0.001    |
| 3395  | AF366264  | 6480040 | 1.04 | 0.001    |
| 12915 | FLCN      | 520039  | 0.96 | 0.001    |
| 15205 | LTK       | 5340259 | 0.96 | 0.001    |
| 12080 | NCL1      | 3830400 | 0.94 | 0.001    |
| 9855  | BC046331  | 6270619 | 1.07 | 0.001    |
| 25357 | NUBF2     | 540400  | 1.06 | 0.001    |
| 18471 | AU040829  | 840360  | 1.07 | 0.001    |

|       |           |         |      |       |
|-------|-----------|---------|------|-------|
| 14446 | PPP2R5C   | 1240397 | 1.08 | 0.001 |
| 3133  | DSRC1     | 3440615 | 0.94 | 0.001 |
| 10732 | FBXW13    | 6130372 | 0.96 | 0.001 |
| 15666 | CHRAC1    | 1500431 | 1.07 | 0.001 |
| 7704  | MAFA      | 6400026 | 0.96 | 0.001 |
| 15544 | SESN2     | 290669  | 1.05 | 0.001 |
| 23193 | TRIM68    | 6650592 | 1.04 | 0.001 |
| 3309  | SPN2      | 650630  | 1.07 | 0.001 |
| 17459 | 9930022N0 | 5050086 | 1.05 | 0.001 |
| 15373 | ATP2A3    | 6370594 | 0.95 | 0.001 |
| 727   | D10BWG13  | 1510482 | 0.91 | 0.001 |
| 13112 | SHPRH     | 3840678 | 1.04 | 0.001 |
| 14953 | PPP1R16B  | 840397  | 1.05 | 0.001 |
| 4592  | EZH2      | 580458  | 0.95 | 0.001 |
| 2160  | SLSA8     | 4540438 | 0.97 | 0.001 |
| 13559 | LOC100039 | 6400050 | 0.96 | 0.001 |
| 9961  | RRS1      | 6290189 | 0.96 | 0.001 |
| 7800  | ADAM17    | 5900653 | 1.04 | 0.001 |
| 14526 | PLA2G4A   | 1450553 | 1.04 | 0.001 |
| 21800 | RCC2      | 3420605 | 1.05 | 0.001 |
| 5454  | PIP4K2A   | 3140678 | 1.10 | 0.001 |
| 11405 | VASH2     | 6980475 | 1.08 | 0.001 |
| 1568  | UGT2A3    | 5720273 | 0.96 | 0.001 |
| 2541  | INSC      | 3520397 | 1.06 | 0.001 |
| 2602  | SNRPE     | 1690609 | 1.04 | 0.001 |
| 17318 | DIS3L     | 2350170 | 0.96 | 0.001 |
| 78    | CUTA      | 6980370 | 0.86 | 0.001 |
| 6847  | BC030440  | 2470333 | 0.96 | 0.001 |
| 17442 | 1700018B2 | 1940010 | 0.95 | 0.001 |
| 7074  | THAP7     | 270376  | 0.91 | 0.001 |
| 18731 | HTR3A     | 4070608 | 1.06 | 0.001 |
| 13015 | CHIA      | 5310152 | 0.97 | 0.001 |
| 8402  | EHMT2     | 3610092 | 1.05 | 0.001 |
| 8665  | 9230110C1 | 2940438 | 0.96 | 0.001 |
| 22067 | TBC1D2    | 5690343 | 1.06 | 0.001 |
| 17005 | WDR31     | 580403  | 0.96 | 0.001 |
| 24610 | AGGF1     | 3800546 | 1.04 | 0.001 |
| 12123 | SYBL1     | 2450524 | 0.97 | 0.001 |
| 4568  | BAT4      | 1660767 | 0.95 | 0.001 |
| 8597  | CD7       | 7380088 | 0.94 | 0.001 |
| 13441 | OLFR1098  | 4260520 | 1.04 | 0.001 |
| 679   | CLEC1A    | 7550022 | 0.96 | 0.001 |
| 11691 | CD151     | 1400630 | 1.16 | 0.001 |
| 2841  | EBI2      | 2600377 | 1.08 | 0.001 |
| 5980  | H2-M10.1  | 20707   | 1.04 | 0.001 |
| 23098 | AQP3      | 3360161 | 1.04 | 0.001 |
| 16483 | FBLN2     | 6040521 | 1.05 | 0.001 |
| 24751 | ALDH18A1  | 4150168 | 1.09 | 0.001 |
| 12308 | COG8      | 6510296 | 1.07 | 0.001 |
| 19007 | TXNDC5    | 1990564 | 0.93 | 0.001 |
| 8972  | OLFR965   | 160674  | 1.04 | 0.001 |
| 11008 | TRPM3     | 5910689 | 1.03 | 0.001 |
| 5521  | ITIC8     | 3710088 | 0.94 | 0.001 |
| 19497 | MKLN1     | 6840537 | 0.94 | 0.001 |
| 15028 | ZDHC24    | 6660487 | 1.05 | 0.001 |
| 16689 | LRCH4     | 6020091 | 0.96 | 0.001 |
| 5794  | BC048403  | 3170722 | 1.06 | 0.001 |
| 6530  | CCDC122   | 6200184 | 0.95 | 0.001 |
| 8574  | ARF6      | 7200358 | 1.07 | 0.001 |
| 18613 | EIF4EBP2  | 4390047 | 0.93 | 0.001 |
| 4982  | CTPS      | 5050577 | 0.95 | 0.001 |
| 16317 | PGAS      | 7160301 | 1.04 | 0.001 |
| 4919  | 4933405O2 | 7210746 | 1.05 | 0.001 |
| 21048 | CALCOXO1  | 1440113 | 0.95 | 0.001 |
| 4027  | GFOD1     | 7050138 | 1.11 | 0.001 |
| 6462  | 1110012D0 | 6180736 | 1.06 | 0.001 |

|       |           |         |      |       |
|-------|-----------|---------|------|-------|
| 10883 | GSN       | 4260709 | 1.05 | 0.001 |
| 21238 | ZFX       | 4200270 | 0.96 | 0.001 |
| 16273 | LOC100047 | 2370132 | 0.95 | 0.001 |
| 11069 | PET112L   | 1580333 | 1.08 | 0.001 |
| 21067 | ARTN      | 240608  | 1.05 | 0.001 |
| 22968 | OLFR872   | 990736  | 1.04 | 0.001 |
| 4700  | RNP51     | 2750356 | 0.91 | 0.001 |
| 8801  | ZKSCAN1   | 3450524 | 1.05 | 0.001 |
| 3558  | PTGER4    | 6200670 | 0.95 | 0.001 |
| 17997 | OLFR1     | 5960424 | 1.03 | 0.001 |
| 10352 | ECE1      | 5700722 | 0.93 | 0.001 |
| 13840 | RFNG      | 150725  | 0.95 | 0.001 |
| 12491 | PLEKHF1   | 1660685 | 1.05 | 0.001 |
| 13704 | CACNG2    | 3520411 | 1.08 | 0.001 |
| 7308  | LOC225922 | 4570358 | 1.05 | 0.001 |
| 18640 | DAPK1     | 4220731 | 0.94 | 0.001 |
| 18476 | HIST1H1E  | 3190364 | 1.03 | 0.001 |
| 10203 | MCTS2     | 1010379 | 1.04 | 0.001 |
| 23228 | PRKACA    | 5690427 | 0.96 | 0.001 |
| 20173 | PTPRM     | 2600367 | 1.03 | 0.001 |
| 17489 | SCSD      | 4150747 | 0.96 | 0.001 |
| 4453  | AKAP1     | 650735  | 0.96 | 0.001 |
| 25242 | MYL2      | 2120356 | 1.08 | 0.001 |
| 410   | MPO       | 6280168 | 0.94 | 0.001 |
| 1411  | 573041019 | 3850632 | 1.04 | 0.001 |
| 977   | HIST1H2BC | 270639  | 0.97 | 0.001 |
| 10462 | TRAM1     | 5910431 | 0.94 | 0.001 |
| 1968  | 1700023B0 | 2680458 | 0.94 | 0.001 |
| 18000 | HCCS      | 2070991 | 1.07 | 0.001 |
| 18853 | RUNX3     | 1170241 | 0.96 | 0.001 |
| 25171 | KIF5A     | 5490131 | 1.19 | 0.001 |
| 4495  | D930036B0 | 4230132 | 1.07 | 0.001 |
| 10590 | GPX1      | 1980301 | 1.13 | 0.001 |
| 12445 | DIAP3     | 4830386 | 1.05 | 0.001 |
| 4016  | OXR1      | 630037  | 1.06 | 0.001 |
| 13456 | CENPK     | 4860600 | 1.07 | 0.001 |
| 1442  | BC051142  | 6420593 | 0.94 | 0.001 |
| 8895  | DNAJC14   | 2370594 | 0.95 | 0.001 |
| 10448 | DOT1L     | 2710504 | 0.94 | 0.001 |
| 24883 | AGTRL1    | 7510653 | 0.95 | 0.001 |
| 13889 | 4921211K0 | 3180465 | 0.95 | 0.001 |
| 5219  | TRUB1     | 1660541 | 1.08 | 0.001 |
| 23898 | ANKRD50   | 6100274 | 0.96 | 0.001 |
| 16837 | MRPL3     | 160370  | 1.05 | 0.001 |
| 3240  | GNB2      | 1170390 | 1.06 | 0.001 |
| 1776  | ARFGAP3   | 1090427 | 1.09 | 0.001 |
| 2374  | SDC1      | 6590541 | 0.96 | 0.001 |
| 3870  | 4930555G0 | 6100561 | 1.03 | 0.001 |
| 12494 | BCKDHB    | 3520148 | 0.91 | 0.001 |
| 17412 | 5730410E1 | 4480221 | 0.88 | 0.001 |
| 2352  | RG53      | 1400707 | 1.03 | 0.001 |
| 10842 | TAZ       | 5130154 | 1.06 | 0.001 |
| 20687 | 281045300 | 3370367 | 1.07 | 0.001 |
| 7095  | MAGEB18   | 2140121 | 0.95 | 0.001 |
| 1220  | ZRSR1     | 6900195 | 1.05 | 0.001 |
| 1022  | 5830415L2 | 6550554 | 1.08 | 0.001 |
| 22110 | TRPS311   | 4480288 | 1.08 | 0.001 |
| 19898 | CXC1      | 70577   | 0.90 | 0.001 |
| 1789  | OSR2      | 4900168 | 0.94 | 0.001 |
| 11753 | V1RJ3     | 7570433 | 1.04 | 0.001 |
| 25398 | ERG       | 3830180 | 1.04 | 0.001 |
| 20798 | OLFR671   | 4570296 | 0.93 | 0.001 |
| 16519 | 493342100 | 4040546 | 0.95 | 0.001 |
| 4088  | RFC4      | 3940458 | 0.95 | 0.001 |
| 2269  | AI846148  | 6650632 | 0.94 | 0.001 |
| 22598 | SUPT5H    | 7400546 | 0.89 | 0.001 |
| 3818  | 9130008F2 | 4200402 | 1.03 | 0.001 |
| 7143  | ZDHHC9    | 3450427 | 1.04 | 0.001 |
| 1670  | LOC100048 | 3870608 | 0.94 | 0.001 |
| 5513  | SLC30A9   | 4280524 | 1.06 | 0.001 |
| 2933  | PEAR1     | 6130044 | 0.96 | 0.001 |
| 3477  | NFATC1    | 450491  | 0.95 | 0.001 |
| 8552  | 493057319 | 2340735 | 0.90 | 0.001 |
| 13710 | DTX1      | 6860022 | 0.93 | 0.001 |
| 19359 | ZNF/NND19 | 6650743 | 0.95 | 0.001 |
| 12294 | NHSL1     | 50241   | 1.06 | 0.001 |
| 7310  | IRAK1BP1  | 6220369 | 1.04 | 0.001 |
| 2892  | MMPIA     | 6380427 | 1.12 | 0.001 |
| 17680 | CDKL2     | 3440088 | 0.91 | 0.001 |
